# Supplementary material for: Highly efficient and large-scalable glucoamylase-catalyzed Henry reactions
Source: Royal Society of Chemistry journal article supplement (doi:10.1039/c3ra41287c), 2013-01-01
Supplement: c3ra41287c.pdf [file c3ra41287c.pdf]

## Supporting information

### High Efficient and Large-scalable Glucoamylase-catalyzed Henry Reactions

Na Gao, Yan-Li Chen, Yan-Hong He<sup>\*</sup>, Zhi Guan<sup>\*</sup>

*School of Chemistry and Chemical Engineering, Southwest University, Chongqing 400715, PR China*

*Fax: +86-23-68254091; e-mail: heyh@swu.edu.cn (for Yan-Hong He); guanzhi@swu.edu.cn ( for Zhi Guan)*

### Contents

|                                                                                                             |    |
|-------------------------------------------------------------------------------------------------------------|----|
| 1. Materials and analytical methods.....                                                                    | 2  |
| 2. Procedures of AnGA purification.....                                                                     | 2  |
| 3. Enzymatic assay of AnGA .....                                                                            | 3  |
| 4. Characterization of Henry products .....                                                                 | 3  |
| 5. List of the obvious difference between <i>syn</i> - and <i>anti</i> - isomers on <sup>1</sup> HNMR ..... | 12 |
| 6. <sup>1</sup> HNMR and <sup>13</sup> CNMR spectra for Henry products .....                                | 13 |
| 7. References.....                                                                                          | 37 |

## 1. Materials and analytical methods

Amyloglucosidase from *Aspergillus niger* [glucoamylase, 1,4- $\alpha$ -D-glucan glucohydrolase, EC 3.2.1.3, ~70 U/mg (One unit corresponds to the amount of enzyme which liberates 1  $\mu$ mole of glucose per minute at pH 4.8 and 60 °C )] was purchased from Sigma-Aldrich. Glucose (HK) Assay Kit (Product Code GAHK 20) was used as received from Sigma-Aldrich. All reagents, 100-kDa cut off centrifugal ultrafilter (Millipore), and PageRuler Prestained Protein Ladder (Thermo) were obtained from different commercial suppliers and were used without further purification. All reactions were monitored by thin-layer chromatography with Haiyang GF254 silica gel plates. Flash column chromatography was performed using 100–200 mesh silica gel at increased pressure. Enzymatic assay of *AnGA* was completed with the method of Spectrophotometric Stop rate Determination.

## 2. Procedures of *AnGA* purification

A centrifugal ultrafiltration strategy was used for the separation and desalting of protein. Briefly, enzyme protein was resolved in ddH<sub>2</sub>O and passed through 100-kDa cut off centrifugal ultrafilters. The retentates were washed three times with ddH<sub>2</sub>O and then dissolved in 200  $\mu$ L of ddH<sub>2</sub>O. Separated protein was analyzed by SDS-polyacrylamide gel electrophoresis (PAGE) on a 10% gradient gel stained with Coomassie brilliant blue (**Fig. 1s**). When 1mg of purified *AnGA* was used to catalyze model Henry reaction, 52% of Henry product was obtained. And its natural activity was 27 U at pH 4.5 and 60 °C.

**M** - Marker;

**1** - commercial enzyme protein (*AnGA*);

**2** - molecular weight higher than 100 kDa;

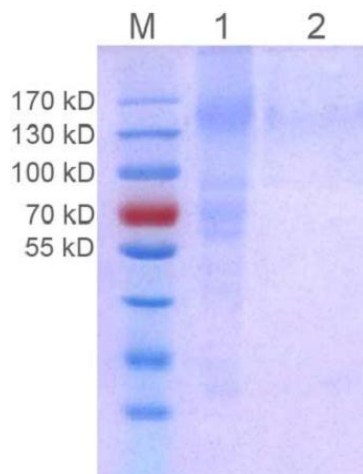

**Fig. 1s** SDS-PAGE analysis of *AnGA*

### 3. Enzymatic assay of *AnGA*

**Unit definition (U/mg):** One unit corresponds to the amount of enzyme which liberates 1  $\mu$ mole of glucose per minute at pH 4.5 and 60 °C.

The procedures of enzymatic assay were based on literature <sup>1</sup> from Sigma-Aldrich.

### 4. Characterization of Henry products

#### 1-(2-Methoxyphenyl)-2-nitroethanol (**3a**) <sup>2,3</sup>

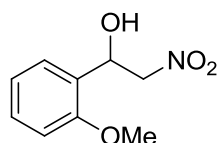

The title compound **3a** was prepared according to the general procedure and purified by column chromatography (petroleum ether/ethyl acetate = 6/1) to give a light yellow oil (86% yield).

**<sup>1</sup>HNMR (CDCl<sub>3</sub>, 400 MHz):**  $\delta$  3.41 (d,  $J$  = 8 Hz, 1H), 3.85 (s, 3H), 4.50-4.63 (m, 2H), 5.59 (br s, 1H), 6.89 (d,  $J$  = 8 Hz, 1H), 6.98 (t,  $J$  = 8 Hz, 1H), 7.31 (t,  $J$  = 8 Hz, 1H), 7.40 (d,  $J$  = 8 Hz, 1H).

**<sup>13</sup>CNMR (CDCl<sub>3</sub>, 100 MHz):**  $\delta$  55.43, 67.76, 79.91, 110.59, 121.12, 126.12, 127.17, 129.79, 156.04.

**1-(3-Methoxyphenyl)-2-nitroethanol (3b)**<sup>4, 5</sup>

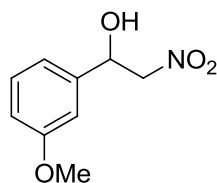

The title compound **3b** was prepared according to the general procedure and purified by column chromatography (petroleum ether/ethyl acetate = 6/1) to give a yellow oil (77% yield).

**<sup>1</sup>HNMR (CDCl<sub>3</sub>, 400 MHz):**  $\delta$  3.23 (br s, 1H), 3.80 (s, 3H), 4.45-4.59 (m, 2H), 5.39 (d,  $J$  = 8 Hz, 1H), 6.86-6.94 (m, 3H), 7.29 (t,  $J$  = 8 Hz, 1H).

**<sup>13</sup>CNMR (CDCl<sub>3</sub>, 100 MHz):**  $\delta$  55.35, 70.90, 81.25, 111.53, 114.37, 118.12, 130.11, 139.90, 160.02.

**2-Nitro-1-(2-nitrophenyl)ethanol (3c)**<sup>5-7</sup>

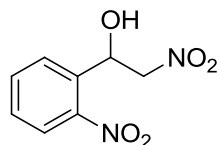

The title compound **3c** was prepared according to the general procedure and purified by column chromatography (petroleum ether/ethyl acetate = 4/1) to give a brown oil (95% yield).

**<sup>1</sup>HNMR (CDCl<sub>3</sub>, 400 MHz):**  $\delta$  3.50 (br s, 1H), 4.53-4.59 (m, 1H), 4.84-4.88 (m, 1H), 6.02-6.05 (m, 1H), 7.54-7.57 (m, 1H), 7.75 (t,  $J$  = 8 Hz, 1H), 7.95 (d,  $J$  = 8 Hz, 1H), 8.06 (d,  $J$  = 8 Hz, 1H).

**<sup>13</sup>CNMR (CDCl<sub>3</sub>, 100 MHz):**  $\delta$  66.81, 80.20, 124.93, 128.71, 129.65, 134.36, 134.49, 147.02.

**2-Nitro-1-(3-nitrophenyl)ethanol (3d)**<sup>6, 7</sup>

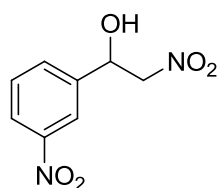

The title compound **3d** was prepared according to the general procedure and purified by column

chromatography (petroleum ether/ethyl acetate = 4/1) to give a white solid (96% yield).

**<sup>1</sup>HNMR (CDCl<sub>3</sub>, 400 MHz):** δ 3.63 (br s, 1H), 4.62-4.64 (m, 2H), 5.61-5.62 (m, 1H), 7.61 (t, *J* = 8 Hz, 1H), 7.79(d, *J* = 8 Hz, 1H), 8.19 (d, *J* = 8 Hz, 1H), 8.30 (s, 1H).

**<sup>13</sup>CNMR (CDCl<sub>3</sub>, 100 MHz):** δ 69.86, 80.72, 121.13, 123.69, 130.12, 132.31, 140.52, 148.34.

**2-Nitro-1-(4-nitrophenyl)ethanol (3e)**<sup>6,7</sup>

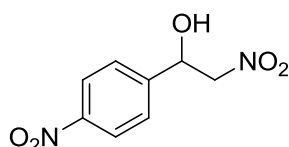

The title compound **3e** was prepared according to the general procedure and purified by column chromatography (petroleum ether/ethyl acetate = 4/1) to give a yellow solid (98% yield).

**<sup>1</sup>HNMR (CDCl<sub>3</sub>, 400 MHz):** δ 3.13 (br s, 1H), 4.58-4.61 (m, 2H), 5.60-5.62 (m, 1H), 7.63 (d, *J* = 8 Hz, 2H), 8.27 (dd, *J* = 8 Hz, 4 Hz, 2H).

**<sup>13</sup>CNMR (CDCl<sub>3</sub>, 100 MHz):** δ 69.97, 80.58, 124.21, 126.95, 144.90, 148.19.

**1-(3-Chlorophenyl)-2-nitroethanol (3f)**<sup>4,5</sup>

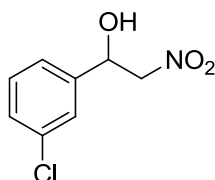

The title compound **3f** was prepared according to the general procedure and purified by column chromatography (petroleum ether/ethyl acetate = 8/1) to give a yellow oil (52% yield).

**<sup>1</sup>HNMR (CDCl<sub>3</sub>, 400 MHz):** δ 3.25 (br s, 1H), 4.48-4.52 (m, 1H), 4.54-4.60 (m, 1H), 5.43 (d, *J* = 8 Hz, 1H), 7.26-7.28 (m, 1H), 7.32-7.34 (m, 2H), 7.41 (s, 1 H).

**<sup>13</sup>CNMR (CDCl<sub>3</sub>, 100 MHz):** δ 70.29, 80.97, 124.09, 126.22, 129.08, 130.33, 134.97, 140.17.

**1-(4-Chlorophenyl)-2-nitroethanol (3g)**<sup>4,8</sup>

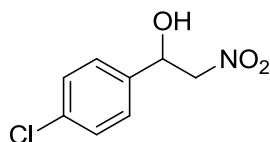

The title compound **3g** was prepared according to the general procedure and purified by column chromatography (petroleum ether/ethyl acetate = 8/1) to give a yellow oil (82% yield).

**<sup>1</sup>HNMR (CDCl<sub>3</sub>, 400 MHz):** δ 3.51 (br s, 1H), 4.44-4.48 (m, 1H), 4.51-4.57 (m, 1H), 5.39 (d, *J* = 8 Hz, 1H), 7.29-7.35 (m, 4H).

**<sup>13</sup>CNMR (CDCl<sub>3</sub>, 100 MHz):** δ 70.30, 81.04, 127.41, 129.17, 134.71, 136.72.

### 3-(1-Hydroxy-2-nitroethyl)benzonitrile (**3h**)<sup>9</sup>

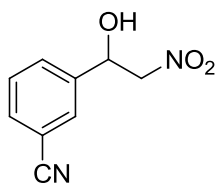

The title compound **3h** was prepared according to the general procedure and purified by column chromatography (petroleum ether/ethyl acetate = 4/1) to give a white solid (97% yield).

**<sup>1</sup>HNMR (CDCl<sub>3</sub>, 400 MHz):** δ 3.39 (br s, 1H), 4.56-4.63 (m, 2H), 5.51-5.55 (m, 1H), 7.52-7.76 (m, 4H).

**<sup>13</sup>CNMR (CDCl<sub>3</sub>, 100 MHz):** δ 69.84, 80.80, 113.10, 118.24, 129.71, 129.86, 130.41, 132.47, 139.84.

### 4-(1-Hydroxy-2-nitroethyl)benzonitrile (**3i**)<sup>2, 9, 10</sup>

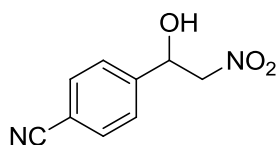

The title compound **3i** was prepared according to the general procedure and purified by column chromatography (petroleum ether/ethyl acetate = 4/1) to give a white solid (99% yield).

**<sup>1</sup>HNMR (CDCl<sub>3</sub>, 400 MHz):** δ 3.31 (d, *J* = 4 Hz, 1H), 4.55-4.60 (m, 2H), 5.53-5.57 (m, 1H), 7.56

(d,  $J = 8$  Hz, 2H), 7.70-7.72 (m, 2H).

$^{13}\text{CNMR}$  ( $\text{CDCl}_3$ , 100 MHz):  $\delta$  70.13, 80.74, 118.28, 126.78, 132.79, 143.41.

**1-(2,6-Dichlorophenyl)-2-nitroethanol (3j)**<sup>9</sup>

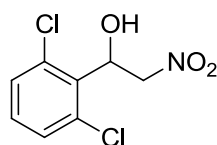

The title compound **3j** was prepared according to the general procedure and purified by column chromatography (petroleum ether/ethyl acetate = 12/1) to give a light yellow oil (93% yield).

$^1\text{HNMR}$  ( $\text{CDCl}_3$ , 400 MHz):  $\delta$  3.64 (d,  $J = 8$  Hz, 1H), 4.53-4.57 (m, 1H), 5.11-5.17 (m, 1H), 6.20-6.25 (m, 1H), 7.22-7.26 (m, 1H), 7.33-7.35 (m, 2H).

$^{13}\text{CNMR}$  ( $\text{CDCl}_3$ , 100 MHz):  $\delta$  68.51, 77.63, 129.71, 130.64, 132.34, 134.77.

**1-(2,4-Dichlorophenyl)-2-nitroethanol (3k)**<sup>3, 6, 11</sup>

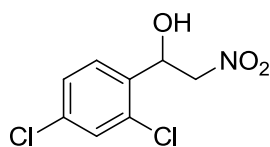

The title compound **3k** was prepared according to the general procedure and purified by column chromatography petroleum ether/ethyl acetate = 12/1) to give a light yellow oil (98% yield).

$^1\text{HNMR}$  ( $\text{CDCl}_3$ , 400 MHz):  $\delta$  3.38 (d,  $J = 4$  Hz, 1H), 4.39-4.45 (m, 1H), 4.62-4.66 (m, 1H), 5.78 (d,  $J = 8$  Hz, 1H), 7.33 (d,  $J = 8$  Hz, 1H), 7.39 (s, 1H), 7.60 (d,  $J = 8$  Hz, 1H).

$^{13}\text{CNMR}$  ( $\text{CDCl}_3$ , 100 MHz):  $\delta$  67.48, 79.20, 127.94, 128.58, 129.41, 132.07, 134.36, 135.08.

**1-(4-Bromophenyl)-2-nitroethanol (3l)**<sup>2, 5, 11</sup>

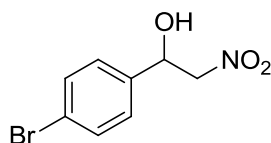

The title compound **3l** was prepared according to the general procedure and purified by column

chromatography (petroleum ether/ethyl acetate = 8/1) to give a yellow oil (89% yield).

**<sup>1</sup>HNMR (CDCl<sub>3</sub>, 400 MHz):** δ 3.36 (br s, 1H), 4.46 (dd, *J* = 12 Hz, 4 Hz, 1H), 4.52-4.58 (m, 1H), 5.40 (d, *J* = 8 Hz, 1H), 7.26 (d, *J* = 8 Hz, 2H), 7.50-7.53 (m, 2H).

**<sup>13</sup>CNMR (CDCl<sub>3</sub>, 100 MHz):** δ 70.35, 80.98, 122.88, 127.70, 132.14, 137.23.

**1-(2-Furanyl)-2-nitroethanol (3m)<sup>2, 6</sup>**

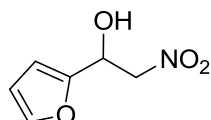

The title compound **3m** was prepared according to the general procedure and purified by column chromatography (petroleum ether/ethyl acetate = 7/1) to give a yellow oil (6% yield).

**<sup>1</sup>HNMR (CDCl<sub>3</sub>, 400 MHz):** δ 2.89 (br s, 1H), 4.66-4.70 (m, 1H), 4.76-4.82 (m, 1H), 5.48 (dd, *J* = 8 Hz, 4 Hz, 1H), 6.38-6.41 (m, 2H), 7.42-7.43 (m, 1H).

**<sup>13</sup>CNMR (CDCl<sub>3</sub>, 100 MHz):** δ 64.88, 78.40, 108.19, 110.67, 143.19, 150.72,

**1-(2-thiophenyl)-2-nitroethanol (3n)<sup>6</sup>**

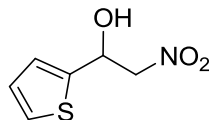

The title compound **3n** was prepared according to the general procedure and purified by column chromatography (petroleum ether/ethyl acetate = 8/1) to give a yellow oil (8% yield).

**<sup>1</sup>HNMR (CDCl<sub>3</sub>, 400 MHz):** δ 3.07 (br s, 1H), 4.60-4.64 (m, 1H), 4.70-4.75 (m, 1H), 5.73 (d, *J* = 8 Hz, 1H), 7.01-7.04 (m, 1H), 7.07-7.08 (m, 1H), 7.34-7.35 (m, 1H).

**<sup>13</sup>CNMR (CDCl<sub>3</sub>, 100 MHz):** δ 67.12, 80.79, 125.07, 126.19, 127.24, 141.23.

**1-(2-Methoxyphenyl)-2-nitroethanol (3o)<sup>12, 13</sup>**

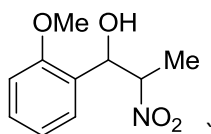

The title compound **3o** was prepared according to the general procedure and purified by column chromatography (petroleum ether/ethyl acetate = 15/1) to give a colourless oil (*syn* 41% yield) and a white solid (*anti* 31% yield).

**<sup>1</sup>HNMR (CDCl<sub>3</sub>, 400 MHz):**  $\delta$  *syn isomer*: 1.34 (d,  $J$  = 8 Hz, 3H), 3.30 (d,  $J$  = 12 Hz, 1H), 3.90 (s, 3H), 4.97-5.04 (m, 1H), 5.14 (t,  $J$  = 8 Hz, 1H), 6.92-7.02 (m, 2H), 7.26-7.36 (m, 2H). *anti isomer*: 1.49 (d,  $J$  = 4 Hz, 3H), 3.04 (d,  $J$  = 4 Hz, 1H), 3.88 (s, 3H), 4.87-4.93 (m, 1H), 5.53-5.55 (m, 1H), 6.90 (d,  $J$  = 8 Hz, 1 Hz, 1H); 7.00 (t,  $J$  = 8 Hz, 1H), 7.29-7.33 (m, 1H), 7.41-7.44 (m, 1H).

**<sup>13</sup>CNMR (CDCl<sub>3</sub>, 100 MHz):**  $\delta$  *syn isomer*: 16.60, 55.45, 74.19, 87.65, 110.99, 121.24, 125.90, 129.02, 130.10, 156.76. *anti isomer*: 12.59, 55.40, 70.77, 85.07, 110.39, 120.97, 126.25, 127.66, 129.47, 155.79.

**1-(4-nitrophenyl)-2-nitropropan-1-ol (**3p**)**<sup>12, 14</sup>

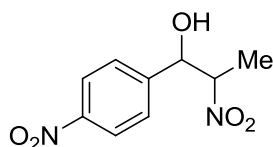

The compound **3p** was prepared according to the general procedure and purified by column chromatography (petroleum ether/ethyl acetate = 8/1) to give a white solid (87% yield).

**<sup>1</sup>HNMR (CDCl<sub>3</sub>, 400 MHz):**  $\delta$  1.38 (d,  $J$  = 4 Hz, 2H), 1.49 (d,  $J$  = 8 Hz, 1H), 3.29 (br s, 1H), 4.72-4.80 (m, 1H), 5.18-5.21 (m, 0.58H), 5.57 (s, 0.42H), 7.58-7.60 (m, 2H), 8.23-8.26 (m, 2H).

**<sup>13</sup>CNMR (CDCl<sub>3</sub>, 400 MHz):**  $\delta$  11.83, 16.20, 72.93, 75.05, 86.83, 87.83, 123.93, 124.09, 127.05, 127.96, 145.37, 145.67, 147.86, 148.24.

**4-(1-hydroxy-2-nitropropyl)benzonitrile (**3q**)**<sup>12, 15</sup>

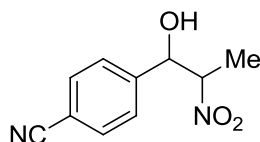

The compound **3q** was prepared according to the general procedure and purified by column chromatography (petroleum ether/ethyl acetate = 6/1) to give colourless oil (89% yield).

**<sup>1</sup>HNMR (CDCl<sub>3</sub>, 400 MHz):** δ 1.34-1.48 (m, 3H), 3.19 (br s, 1H), 4.68-4.75 (m, 1H), 5.12 (d, *J* = 8 Hz, 0.50H), 5.49 (d, *J* = 4 Hz, 0.50H), 7.52-7.55 (m, 2H), 7.67-7.71 (m, 2H).

**<sup>13</sup>CNMR (CDCl<sub>3</sub>, 400 MHz):** δ 11.86, 16.18, 73.08, 75.24, 86.90, 87.86, 112.05, 112.67, 118.26, 118.42, 126.89, 127.79, 132.54, 132.71, 143.72.

**1-(4-bromophenyl)-2-nitropropan-1-ol (3r)**<sup>12, 15</sup>

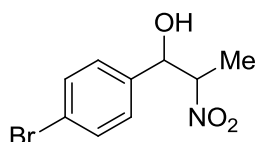

The compound **3r** was prepared according to the general procedure and purified by column chromatography (petroleum ether/ethyl acetate = 15/1) to give a white solid (65% yield).

**<sup>1</sup>HNMR (CDCl<sub>3</sub>, 400 MHz):** δ 1.32, (d, *J* = 8 Hz, 2H), 1.48 (d, *J* = 8 Hz, 1H), 2.80-2.88 (m, 1H), 4.62-4.75 (m, 1H), 5.00 (d, *J* = 8 Hz, 0.64H), 5.36 (s, 0.36H), 7.24-7.27 (m, 2H), 7.50-7.55 (m, 2H).

**<sup>13</sup>CNMR (CDCl<sub>3</sub>, 100 MHz):** δ 11.99, 16.33, 73.32, 75.55, 87.17, 88.17, 122.47, 123.17, 127.74, 128.63, 131.87, 132.14, 137.32, 137.55.

**1-(2-Methoxyphenyl)-2-nitrobutan-1-ol (3s)**<sup>13, 16</sup>

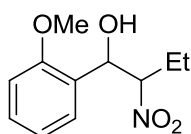

The compound **3s** was prepared according to the general procedure and purified by column

chromatography (petroleum ether/ethyl acetate = 15/1) to give a yellow oil (*anti* 31% yield, *syn* 30% yield).

**<sup>1</sup>H NMR (CDCl<sub>3</sub>, 400 MHz):** δ *syn* isomer: 0.87 (t, *J* = 6 Hz, 3H), 1.37-1.47 (m, 1H), 1.85-1.97 (m, 1H), 3.33 (d, *J* = 8 Hz, 1H), 3.89 (s, 3H), 4.81-4.87 (m, 1H), 5.13 (t, *J* = 10 Hz, 1H), 6.92-7.02 (m, 2H), 7.25-7.36 (m, 2H). *anti* isomer: 0.92 (t, *J* = 8 Hz, 3H), 1.86-1.96 (m, 1H), 2.08-2.20 (m, 1H), 3.37 (d, *J* = 8 Hz, 1H), 3.88 (s, 3H), 4.75-4.80 (m, 1H), 5.24 (t, *J* = 6 Hz, 1H), 6.89-7.02 (m, 2H), 7.26-7.34 (m, 2H).

**<sup>13</sup>C NMR (CDCl<sub>3</sub>, 100 MHz):** δ *syn* isomer: 10.22, 24.11, 55.47, 73.42, 94.47, 111.00, 121.23, 126.16, 128.93, 130.07, 156.74. *anti* isomer: 10.48, 21.70, 55.44, 72.10, 92.58, 110.64, 121.00, 126.02, 128.30, 129.67, 156.18.

**1-(4-nitrophenyl)-2-nitrobutan-1-ol (3t)<sup>13,16</sup>**

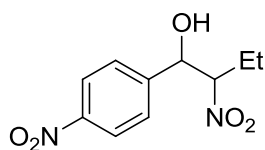

The compound **3t** was prepared according to the general procedure and purified by column chromatography (petroleum ether/ethyl acetate = 8/1) to give a white solid (87% yield).

**<sup>1</sup>H NMR (CDCl<sub>3</sub>, 400 MHz):** δ 0.89-0.96 (m, 3H), 1.80-2.24 (m, 2H), 3.25-3.29 (m, 1H), 4.57-4.65 (m, 1H), 5.17-5.20 (m, 0.61H), 5.33-5.34 (m, 0.39H), 7.58-7.60 (m, 2H), 8.21-8.26 (m, 2H).

**<sup>13</sup>C NMR (CDCl<sub>3</sub>, 100 MHz):** δ 10.05, 10.33, 21.26, 23.82, 73.27, 74.32, 94.16, 94.63, 123.89, 124.11, 127.30, 127.88, 145.73, 147.94, 148.22.

**4-(1-Hydroxy-2-nitrobutyl)benzonitrile (3u)<sup>12,15</sup>**

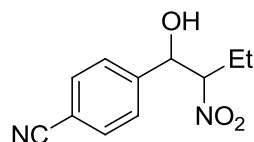

The compound **3u** was prepared according to the general procedure and purified by column chromatography (petroleum ether/ethyl acetate = 6/1) to give a white solid (87% yield).

**<sup>1</sup>HNMR (CDCl<sub>3</sub>, 400 MHz):** δ 0.90-0.96 (m, 3H), 1.46-1.50 (m, 1H), 1.81-1.95 (m, 1H), 2.97 (d, *J* = 4 Hz, 1H), 4.53-4.62 (m, 1H), 5.10-5.13 (m, 0.70H), 5.26-5.28 (m, 0.30H), 7.51-7.53 (m, 2H), 7.67-7.72 (m, 2H).

**<sup>13</sup>CNMR (CDCl<sub>3</sub>, 100 MHz):** δ 10.07, 10.34, 21.33, 23.79, 73.42, 74.54, 94.23, 94.68, 112.31, 112.76, 118.24, 118.38, 127.12, 127.71, 132.51, 132.73, 144.00.

**1-(4-bromophenyl)-2-nitrobutan-1-ol (3v)**<sup>12, 15</sup>

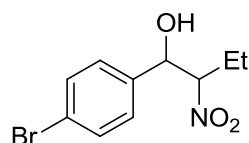

The compound **3v** was prepared according to the general procedure and purified by column chromatography (petroleum ether/ethyl acetate = 15/1) to give a colorless oil (74% yield).

**<sup>1</sup>HNMR (CDCl<sub>3</sub>, 400 MHz):** δ 0.86-0.95 (m, 3H), 1.39-1.46 (m, 1H), 1.79-1.89 (m, 1H), 2.69 (s, 1H), 4.50-4.59 (m, 1H), 5.01 (d, *J* = 8 Hz, 0.77H), 5.14 (d, *J* = 4 Hz, 0.23H), 7.24-7.26 (m, 2H), 7.50-7.55 (m, 2H).

**<sup>13</sup>CNMR (CDCl<sub>3</sub>, 100 MHz):** δ 10.06, 10.36, 21.33, 23.88, 73.62, 74.82, 94.44, 94.96, 122.71, 123.18, 127.95, 128.55, 131.90, 132.18, 137.57, 137.66.

**5. List of the obvious difference between *syn*- and *anti*- isomers on <sup>1</sup>HNMR**

| Entry | Product | <sup>1</sup> HNMR (-CHOH) [ppm] |
|-------|---------|---------------------------------|
|-------|---------|---------------------------------|

|   |           | <i>syn</i>            | <i>anti</i>          |
|---|-----------|-----------------------|----------------------|
| 1 | <b>3o</b> | 5.14 (t, $J = 8$ Hz)  | 5.53-5.55 (m)        |
| 2 | <b>3p</b> | 5.18-5.21 (m)         | 5.57 (s)             |
| 3 | <b>3q</b> | 5.12 (d, $J = 8$ Hz)  | 5.49 (d, $J = 4$ Hz) |
| 4 | <b>3r</b> | 5.00 (d, $J = 4$ Hz)  | 5.36 (s)             |
| 5 | <b>3s</b> | 5.13 (t, $J = 10$ Hz) | 5.24 (t, $J = 6$ Hz) |
| 6 | <b>3t</b> | 5.17-5.20 (m)         | 5.33-5.34 (m)        |
| 7 | <b>3u</b> | 5.10-5.13 (m)         | 5.26-5.28 (m)        |
| 8 | <b>3v</b> | 5.01 (d, $J = 8$ Hz)  | 5.14 (d, $J = 4$ Hz) |

## 6. $^1\text{H}$ NMR and $^{13}\text{C}$ NMR spectra for Henry products

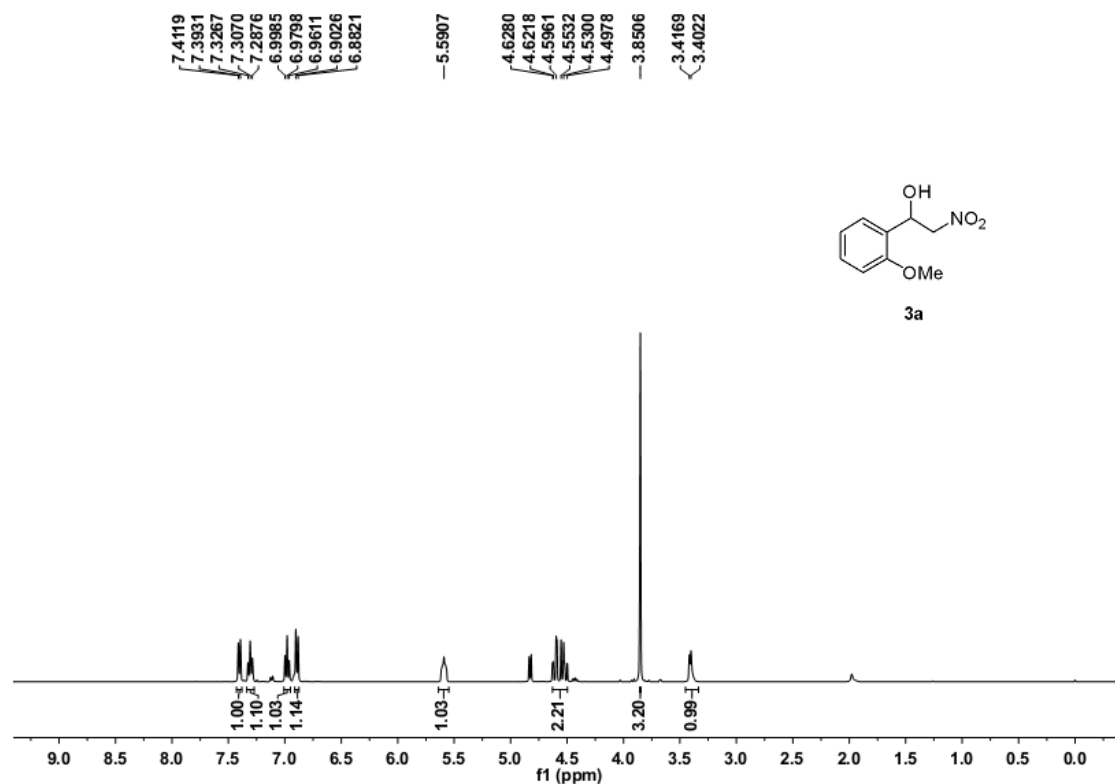

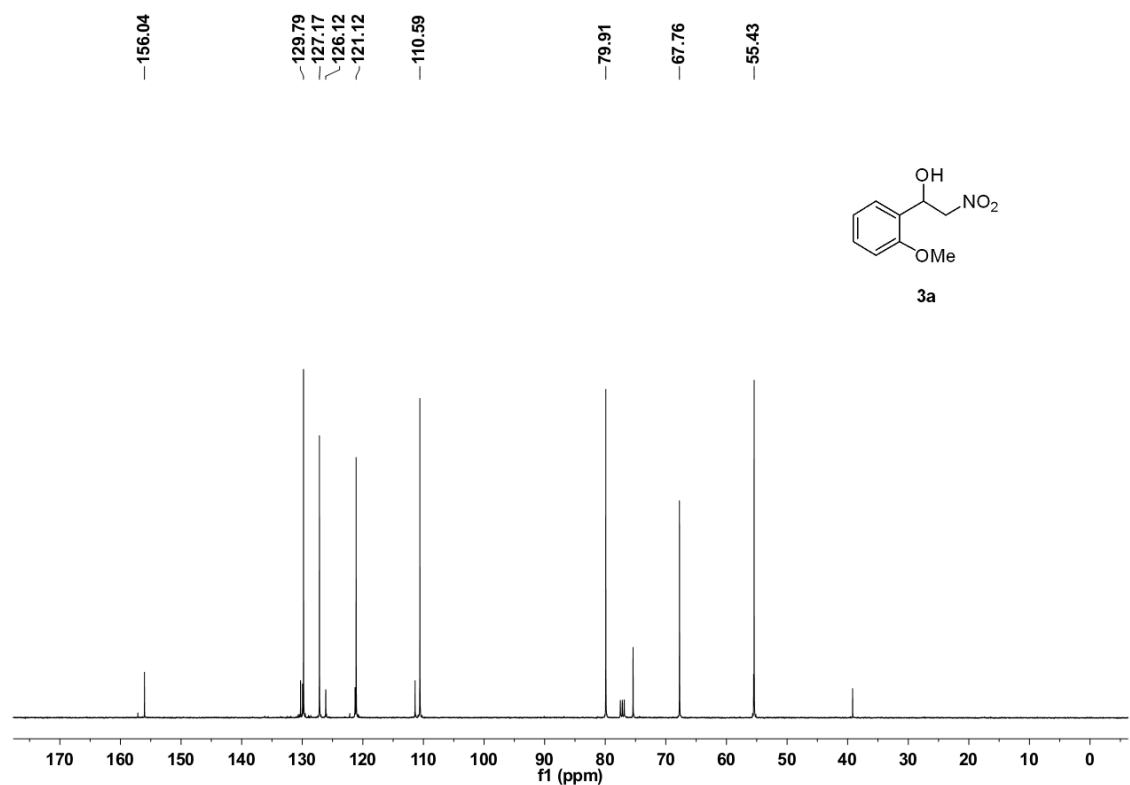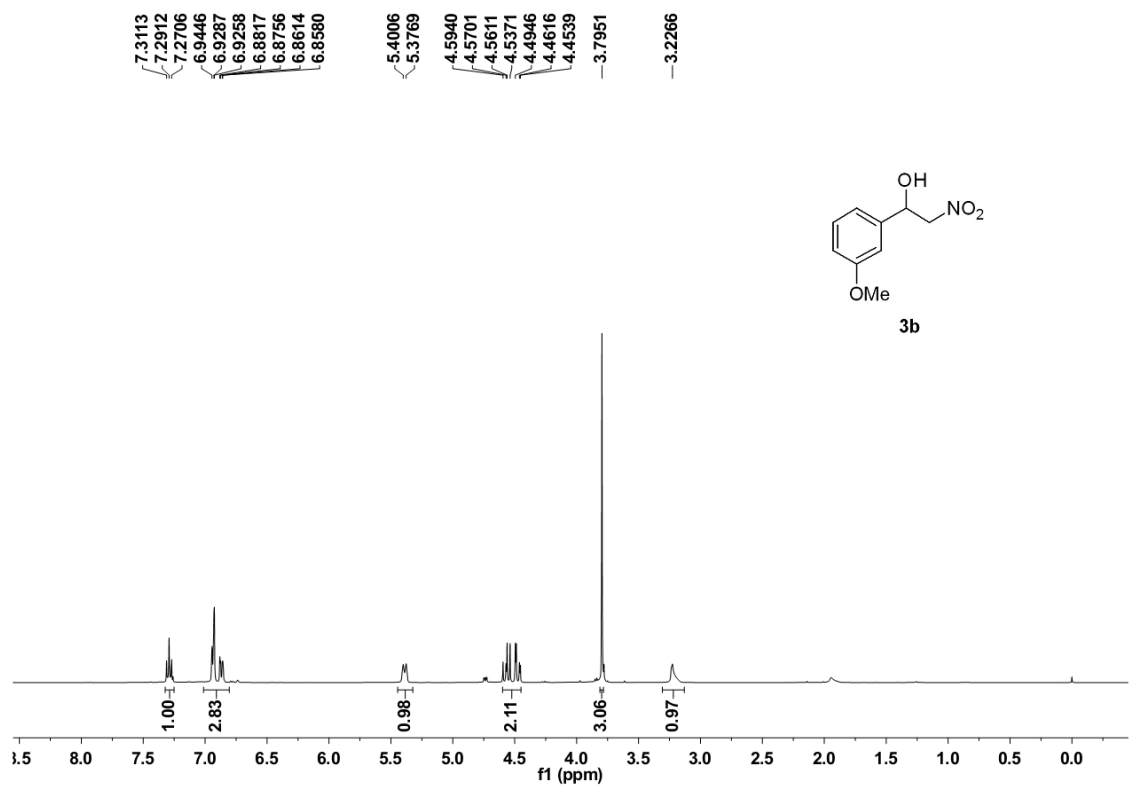

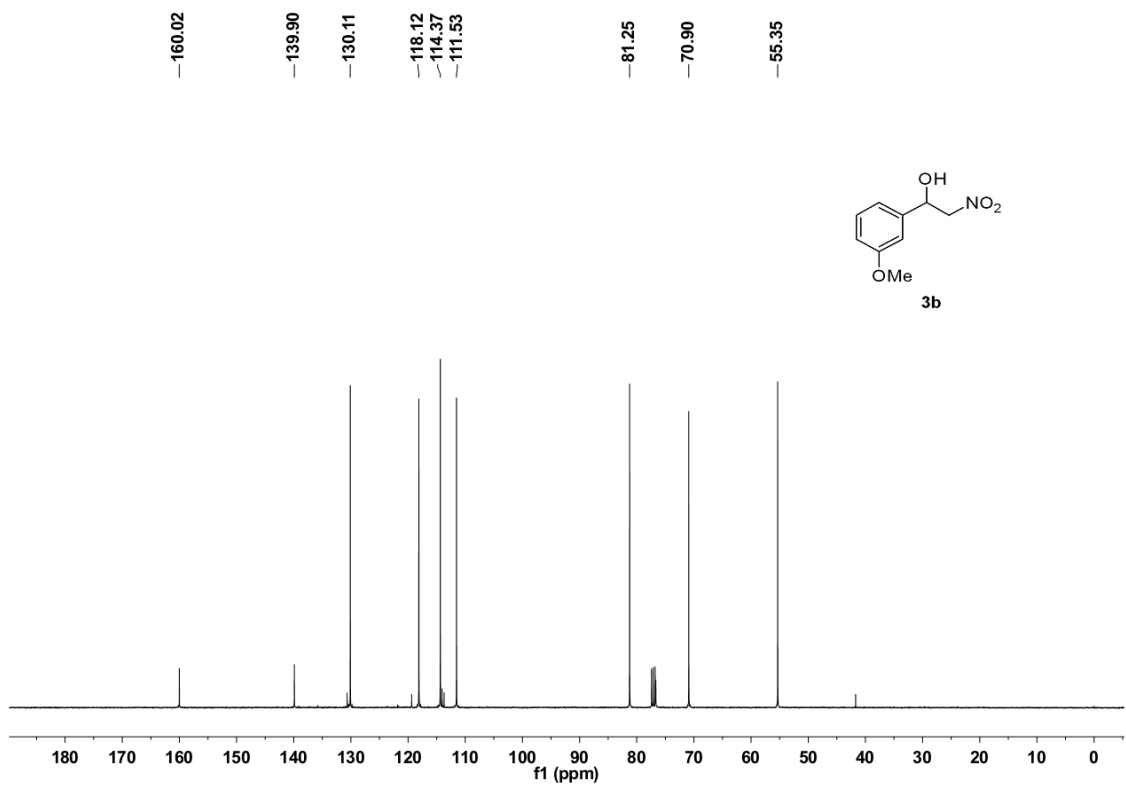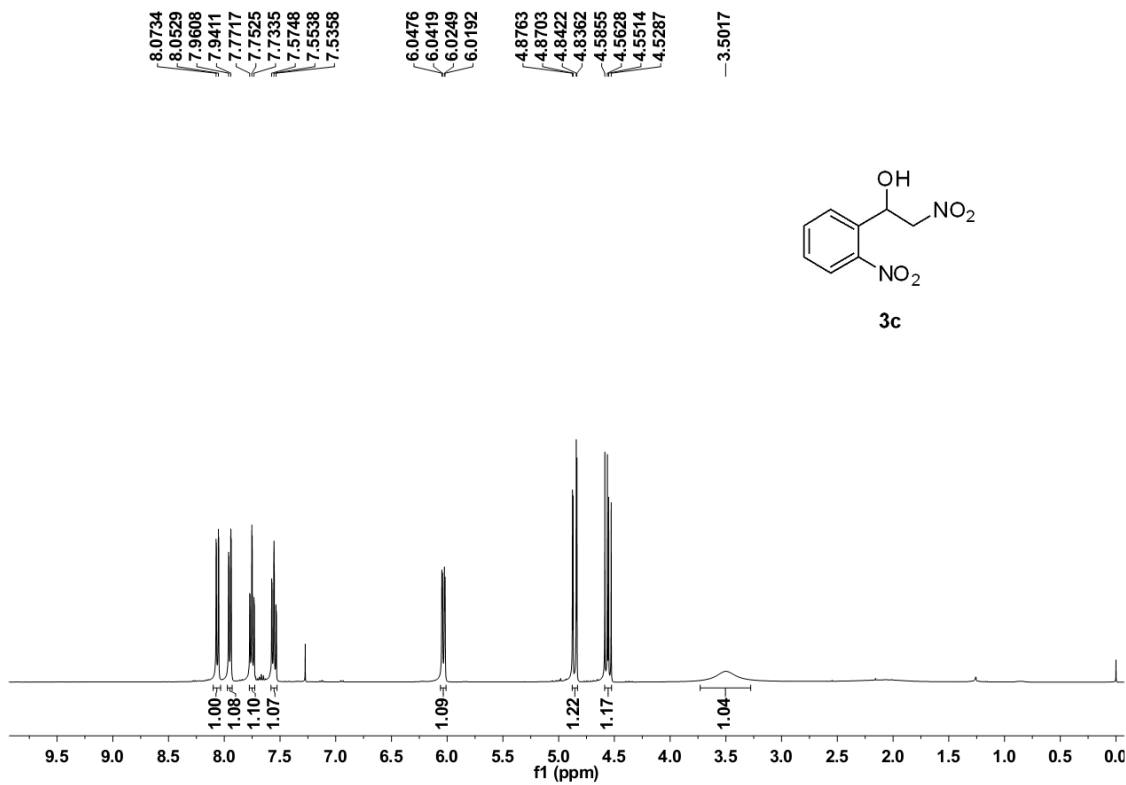

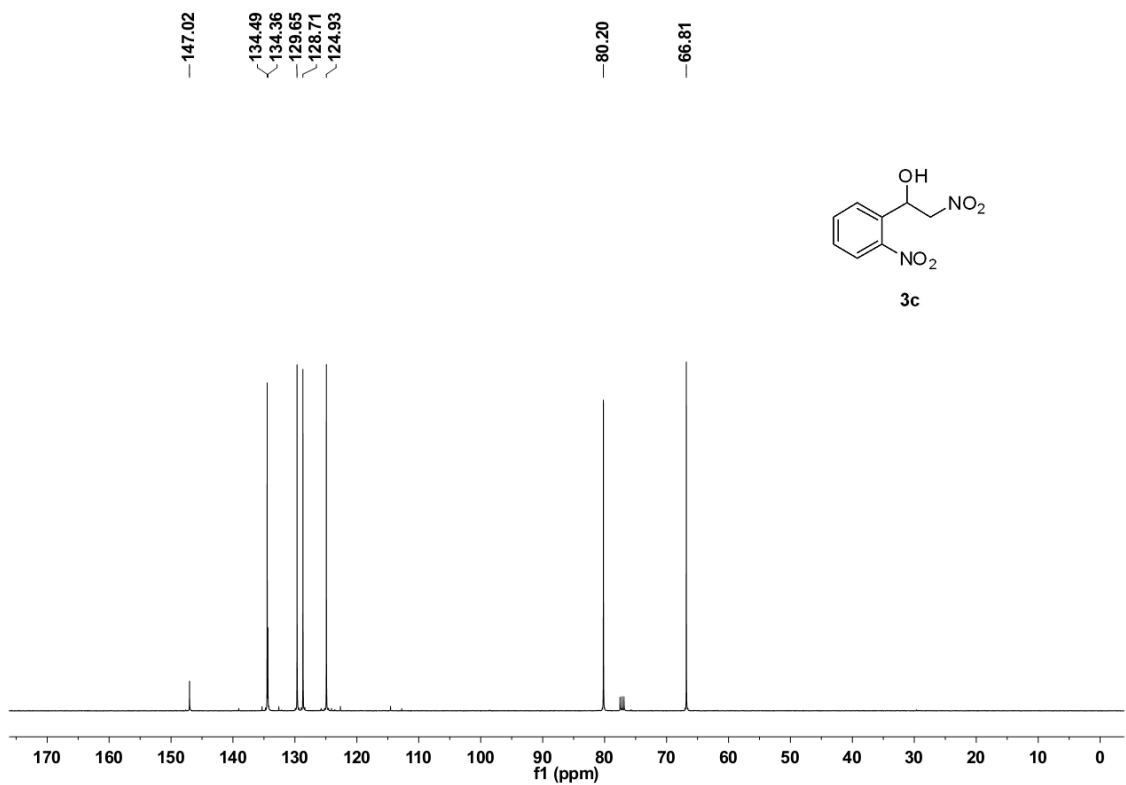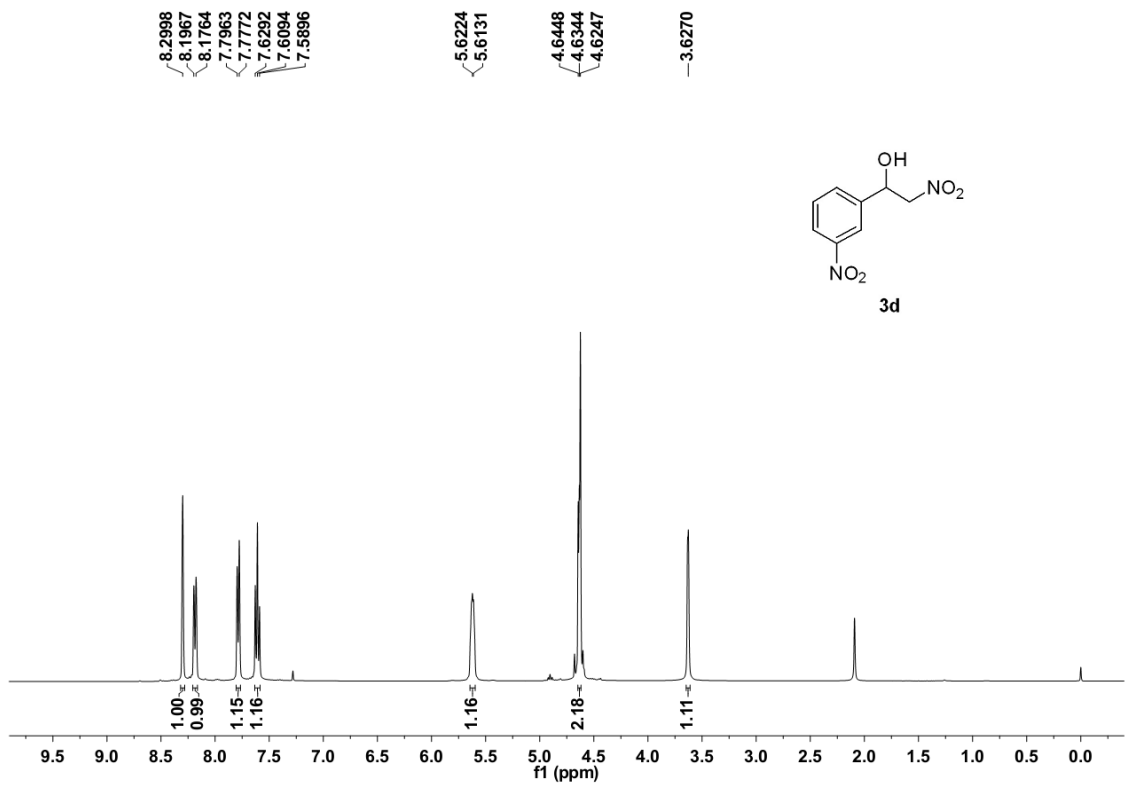

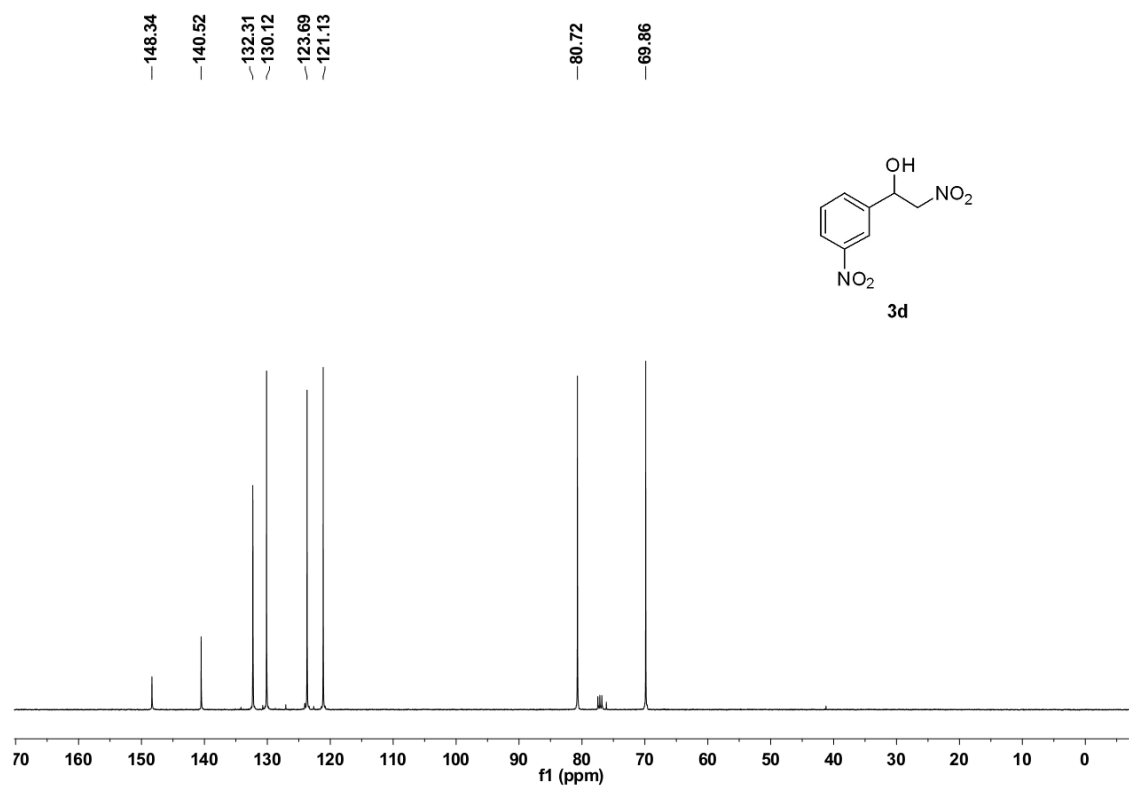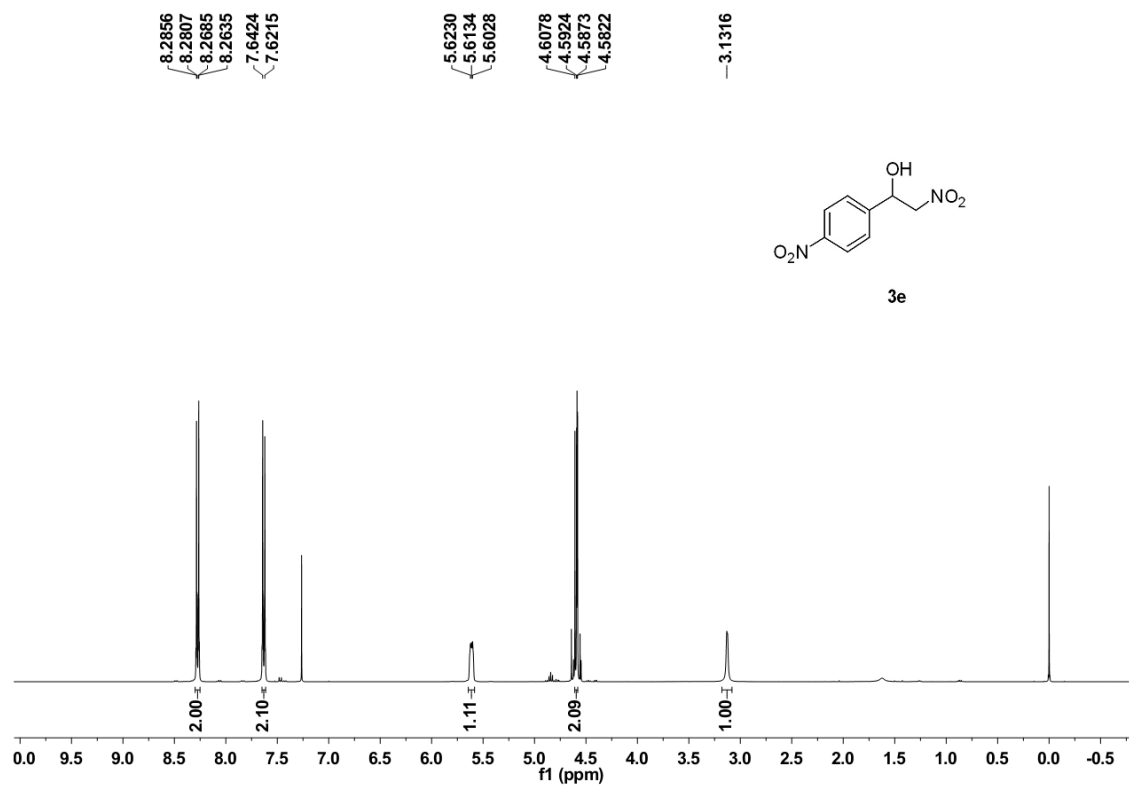

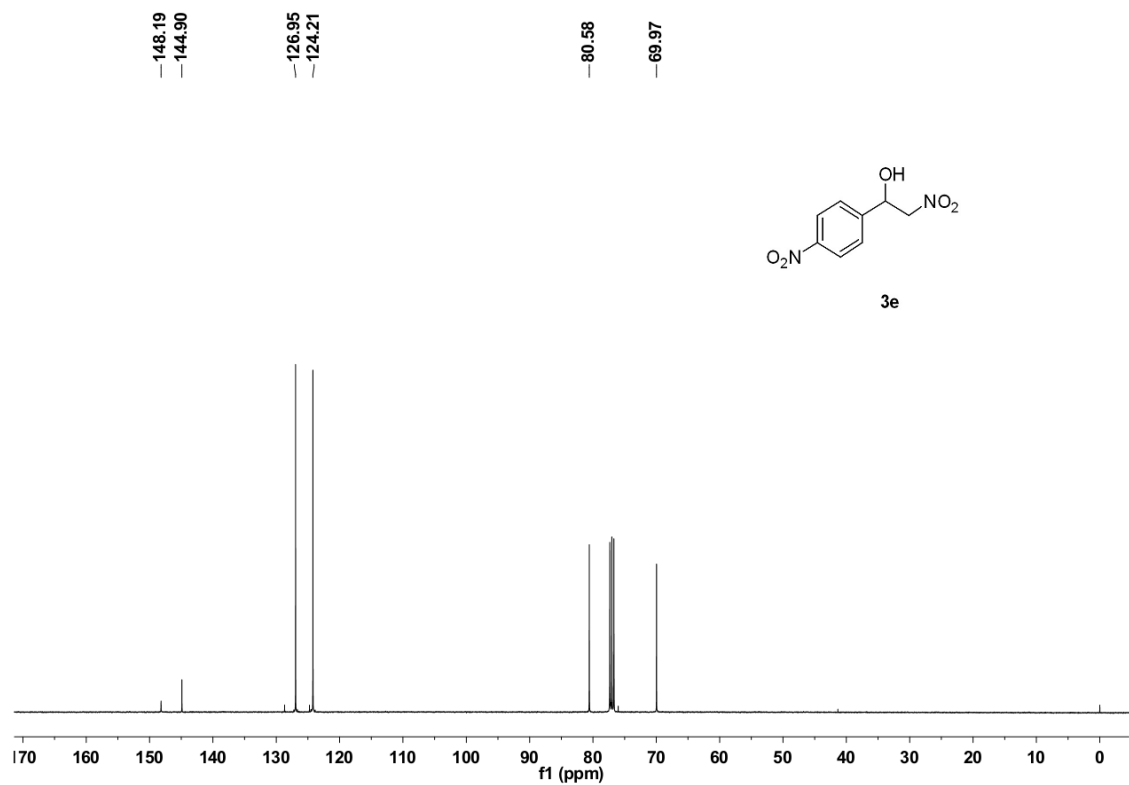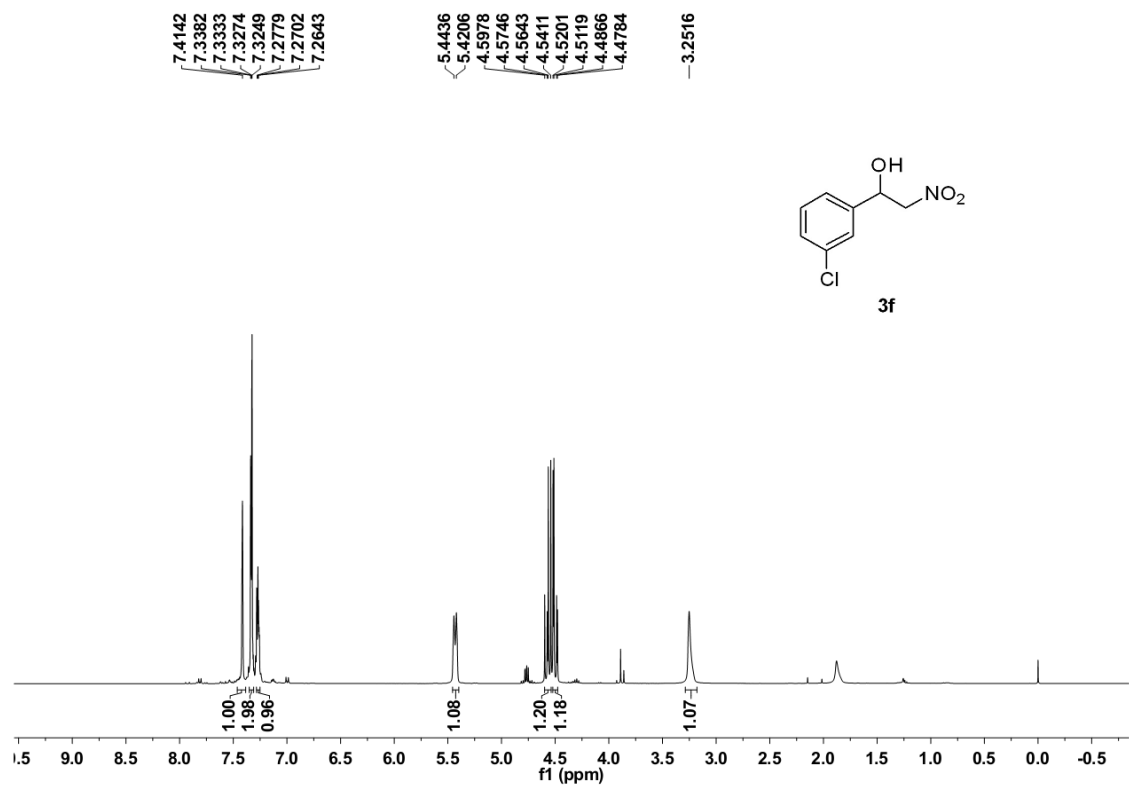

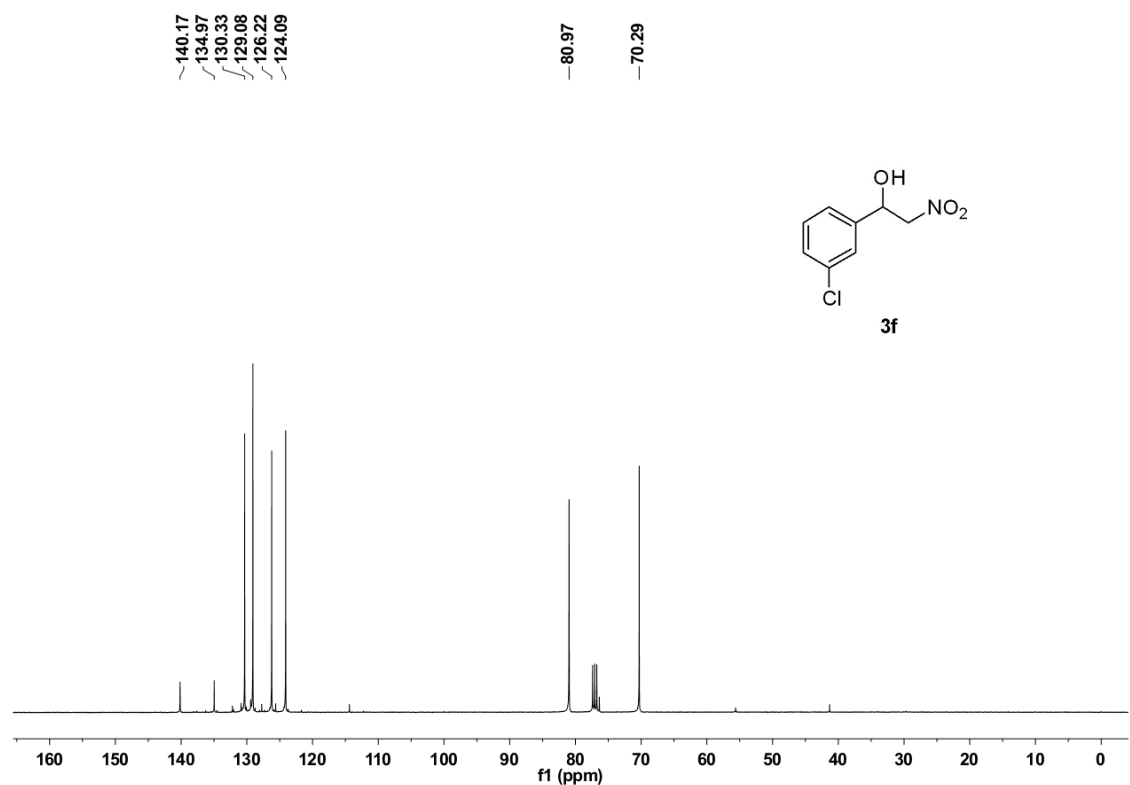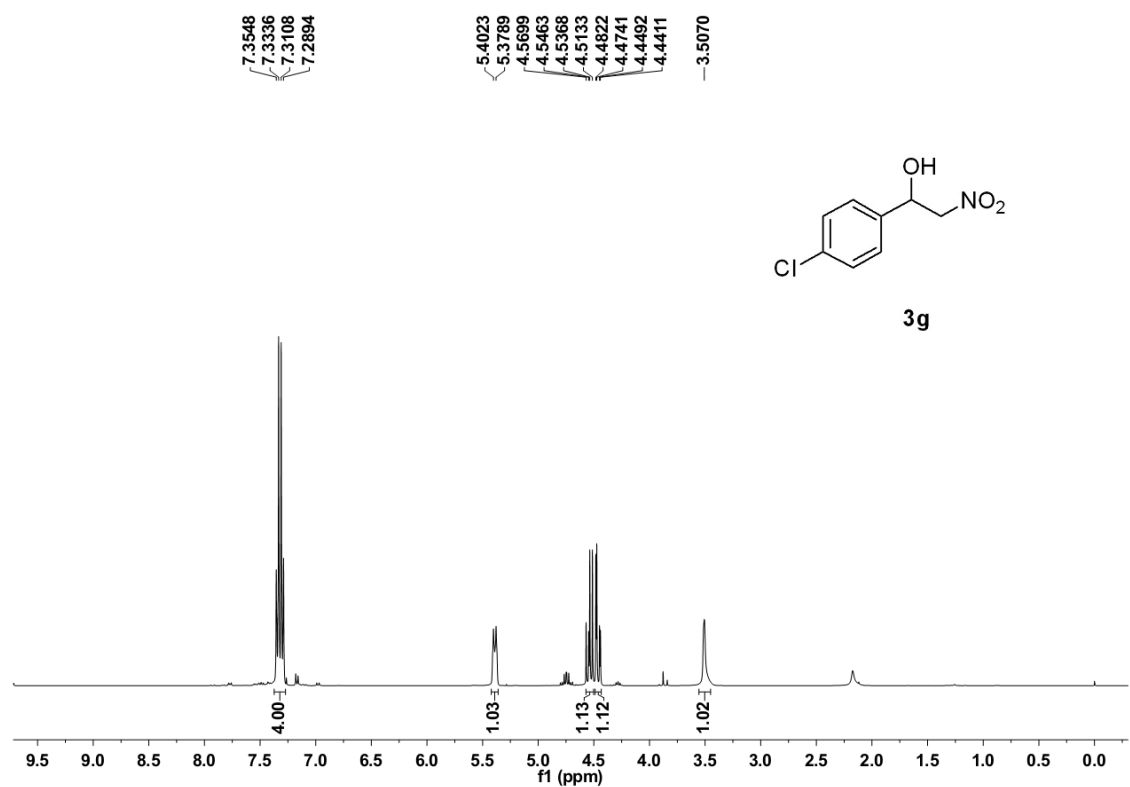

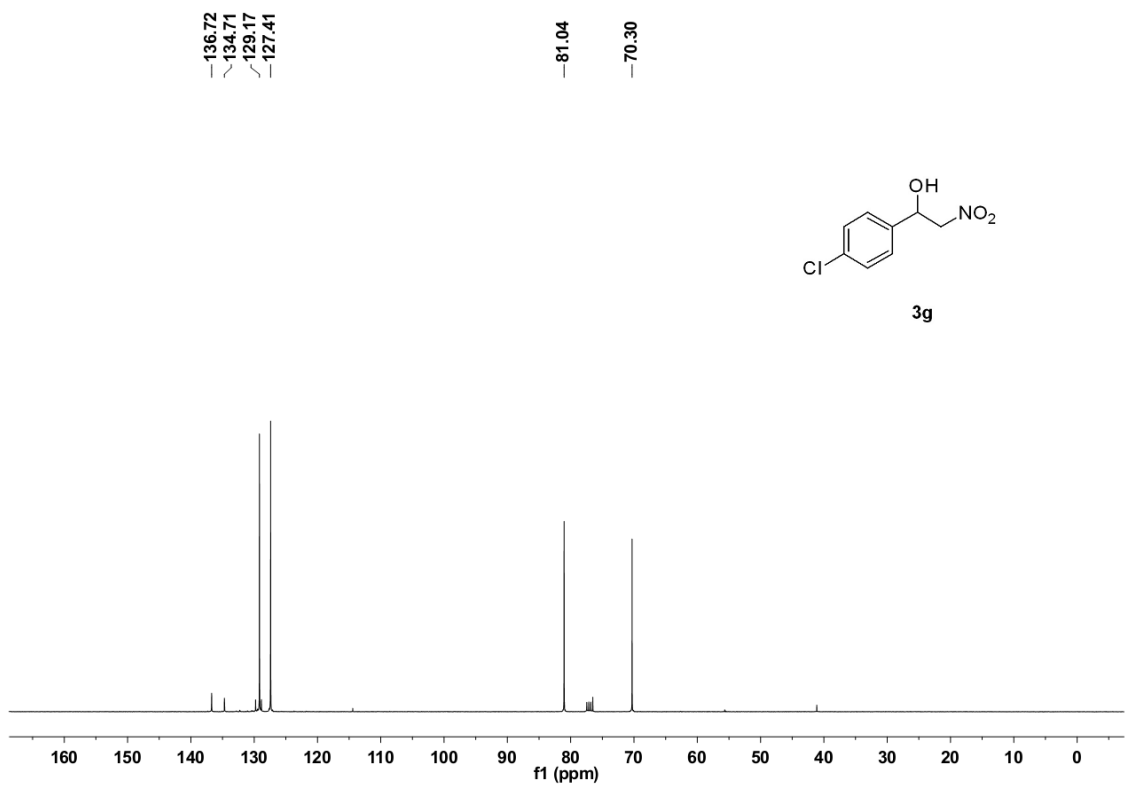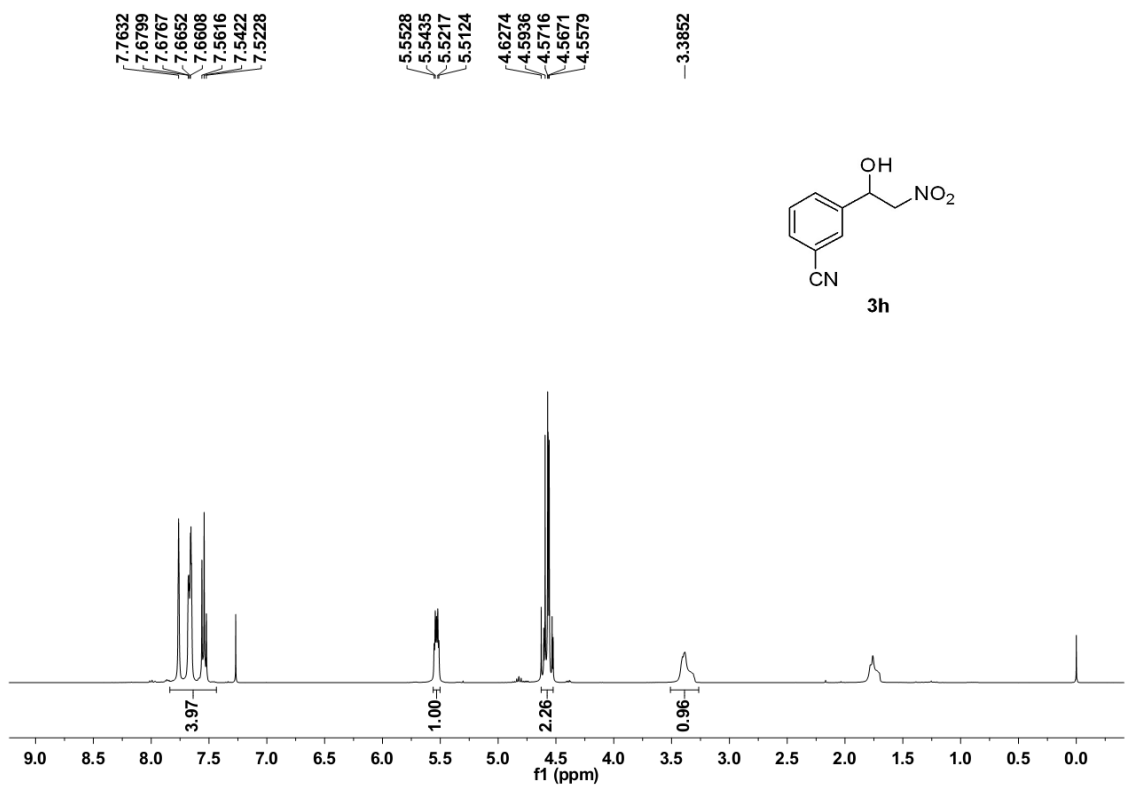

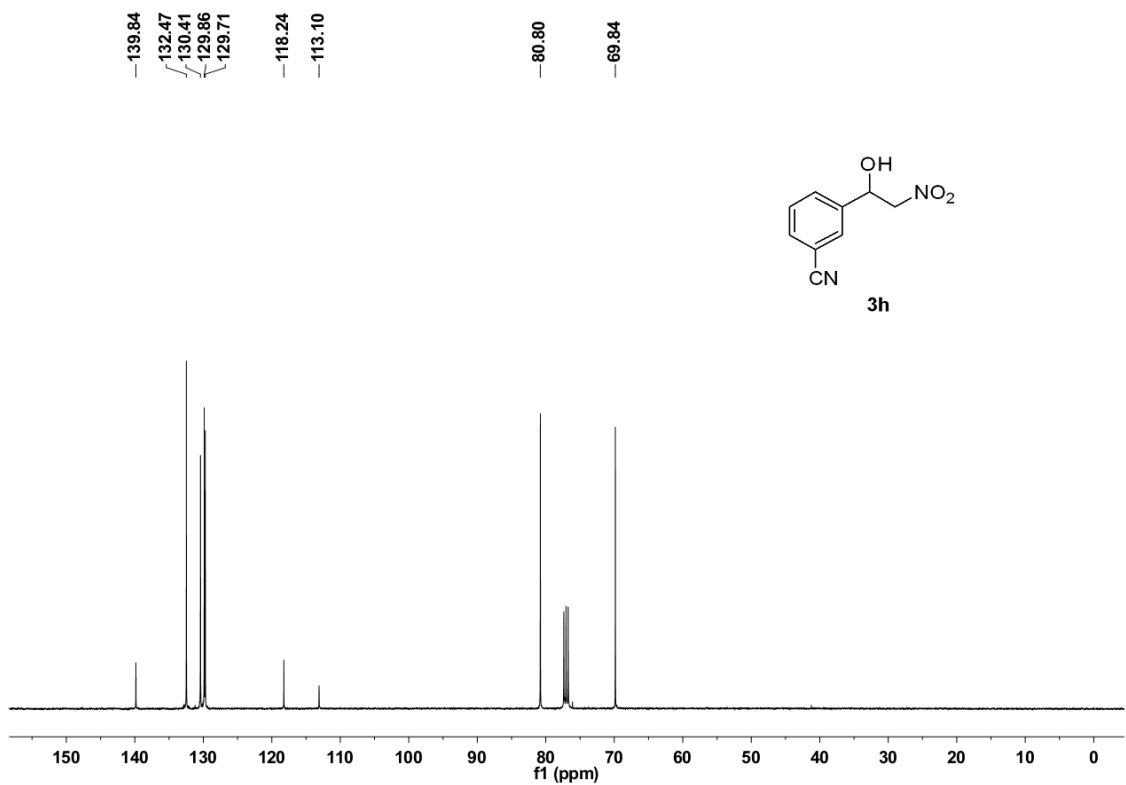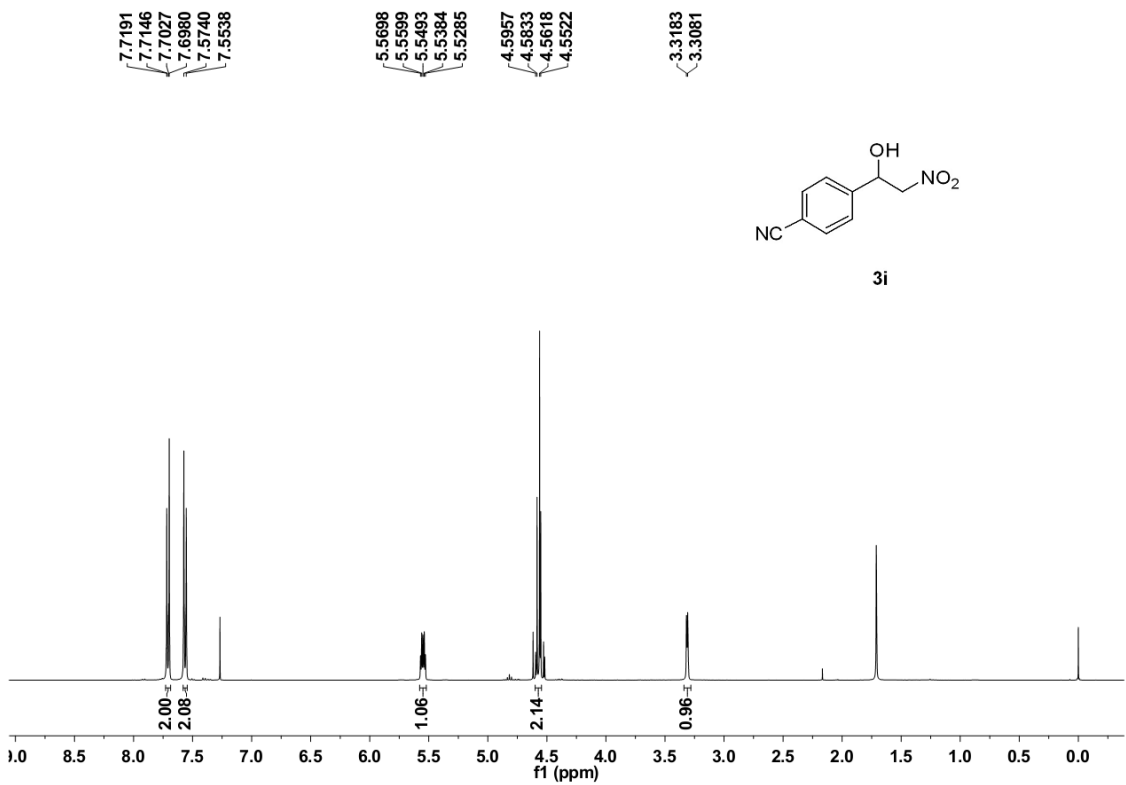

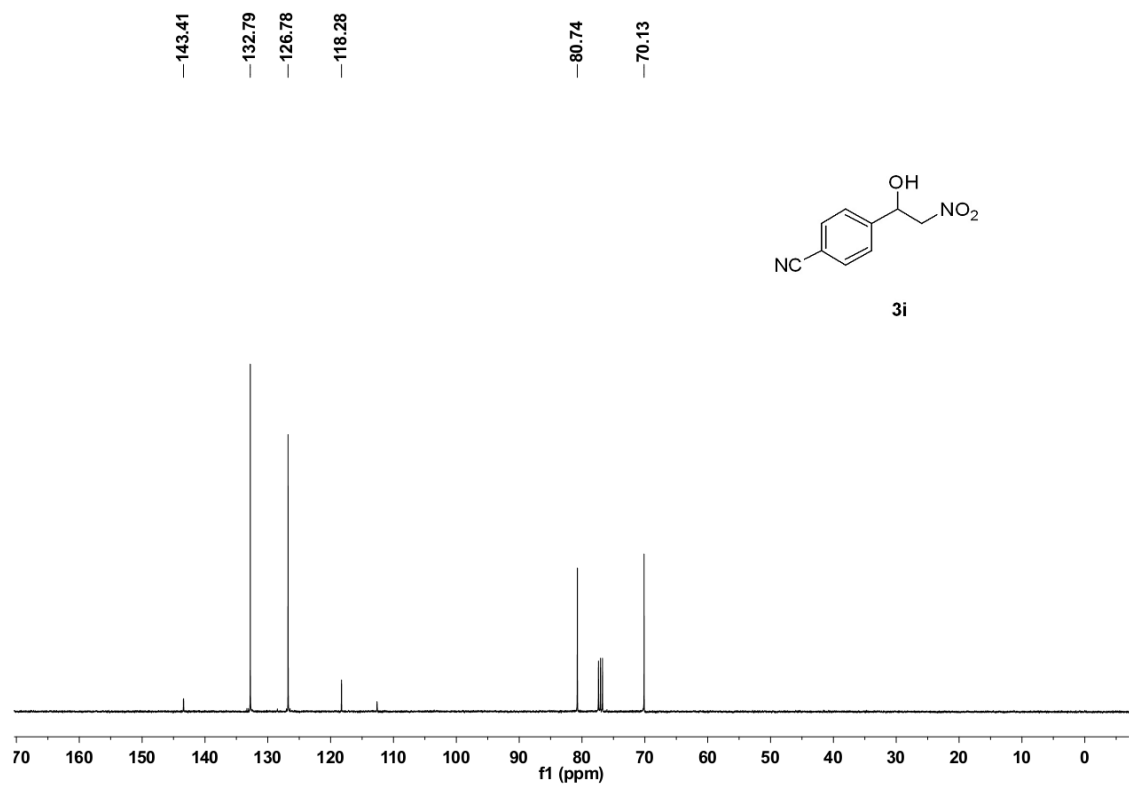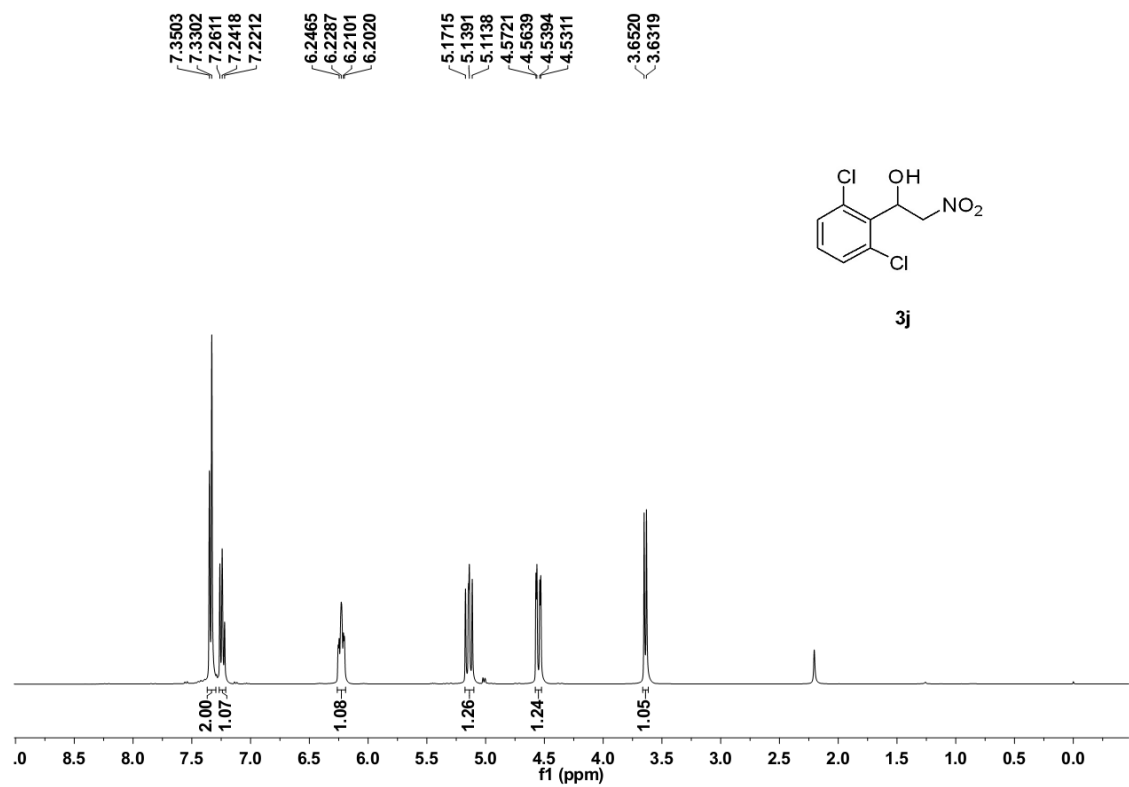

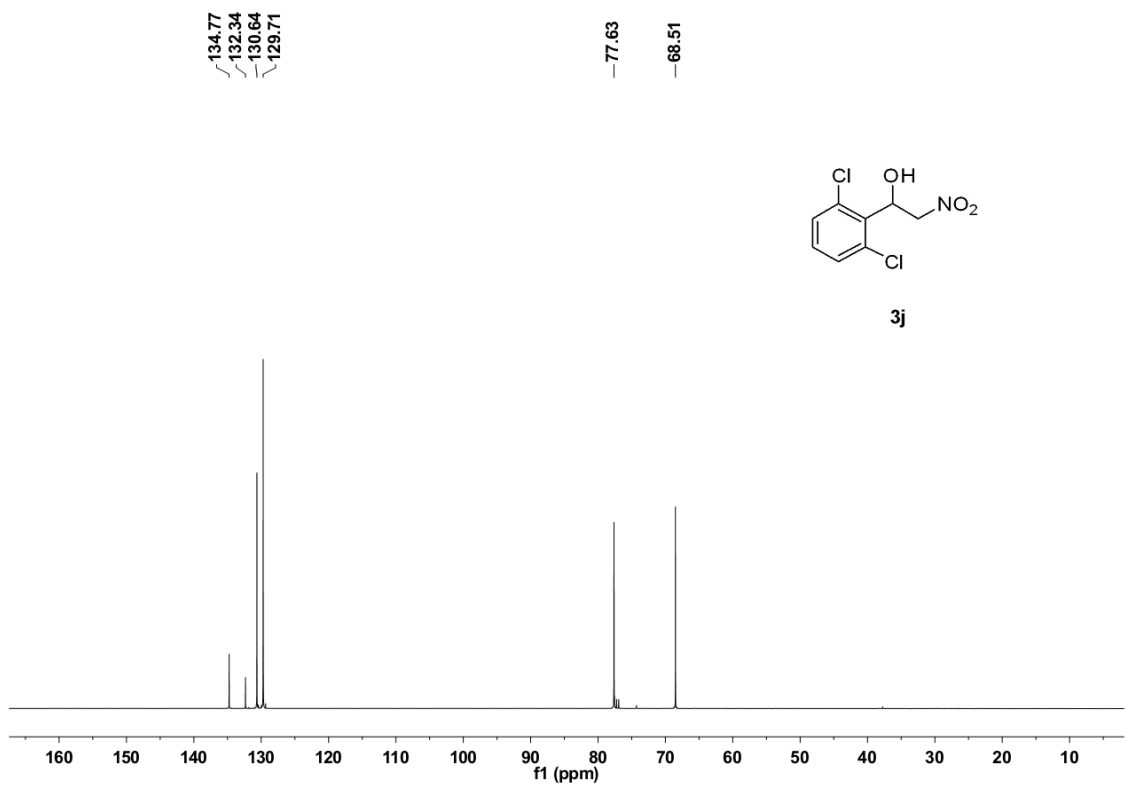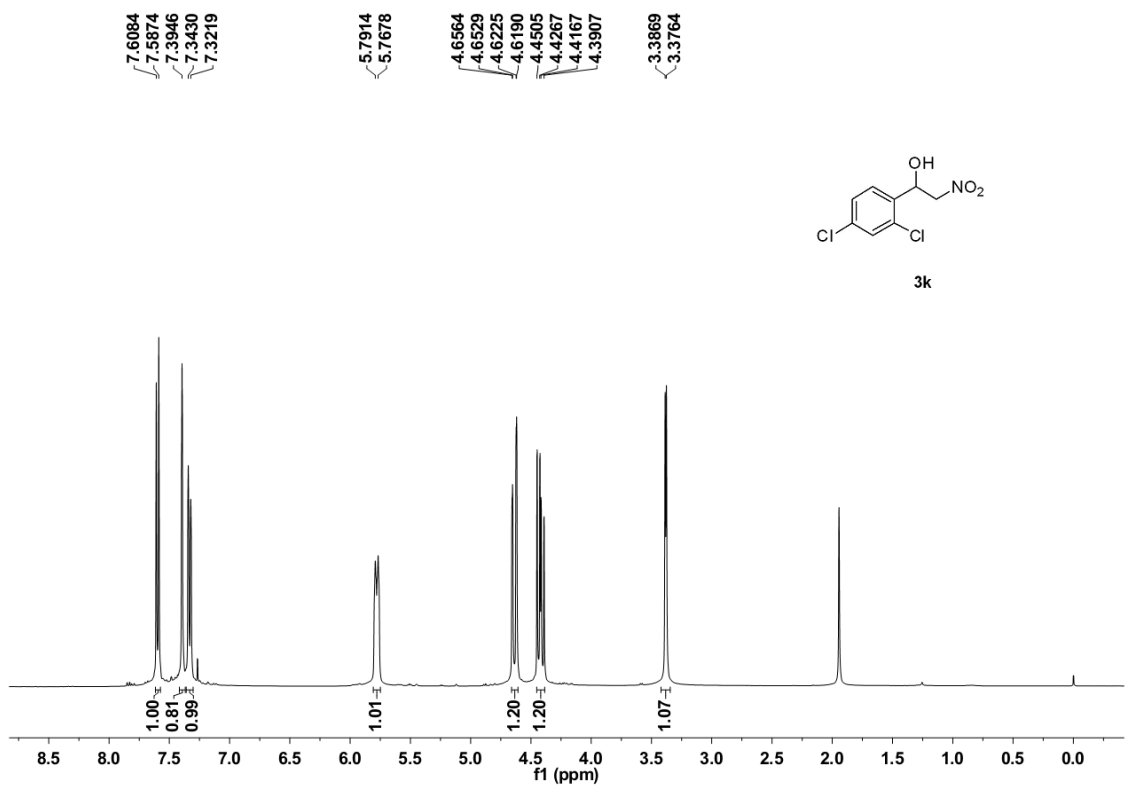

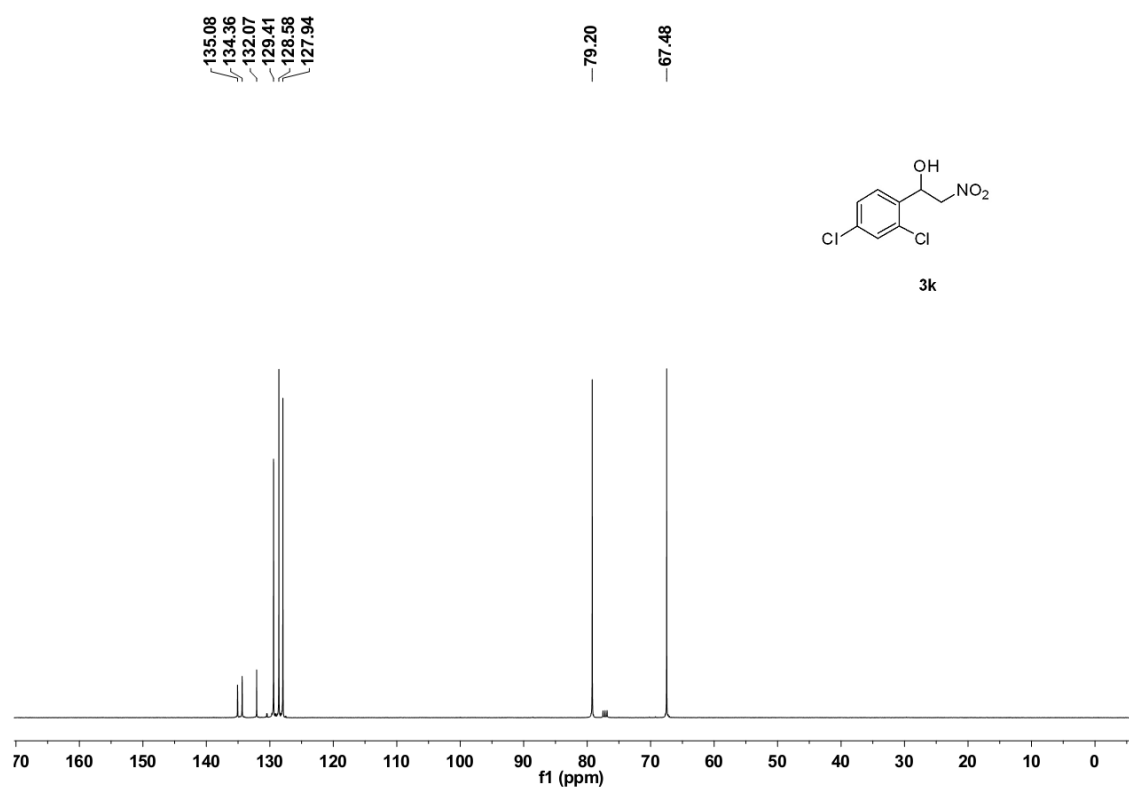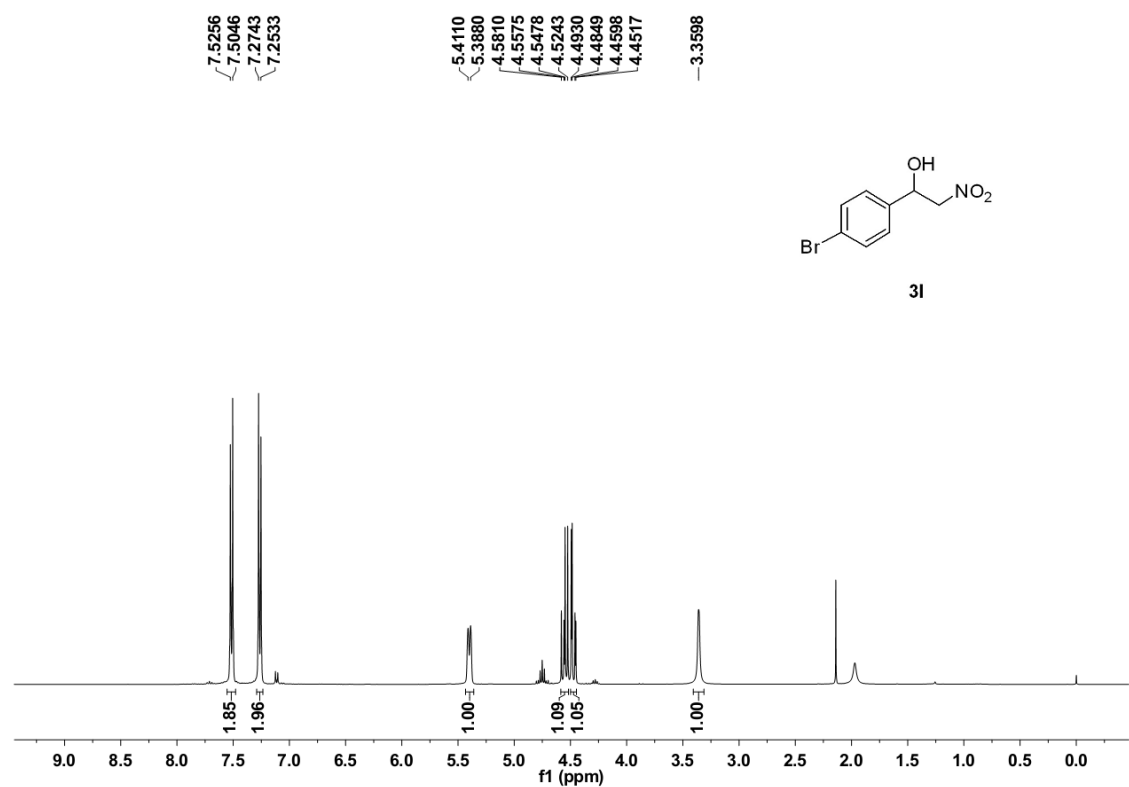

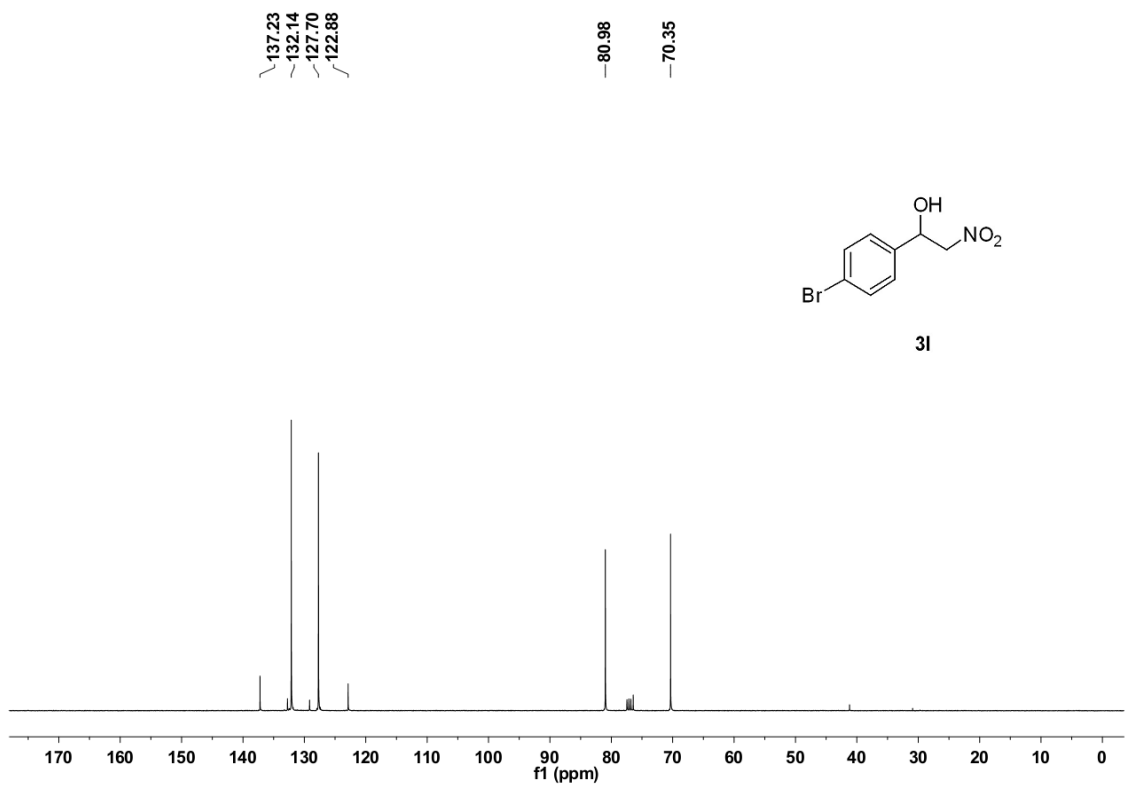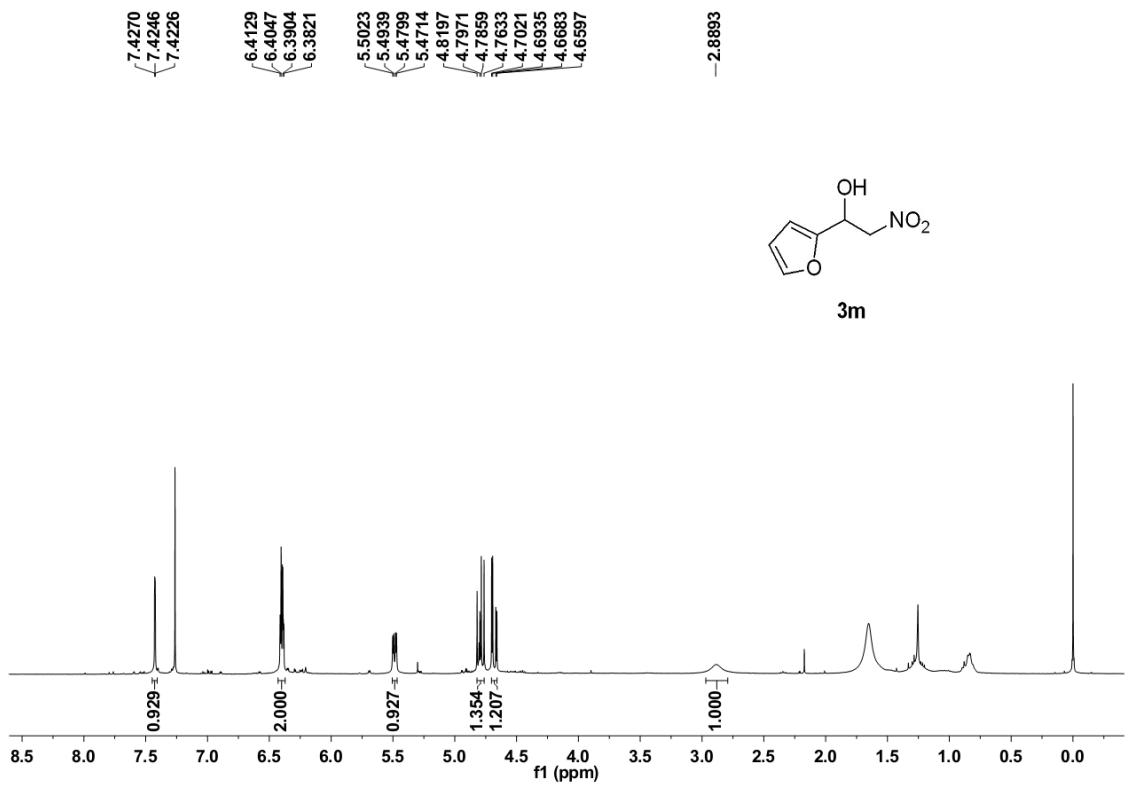

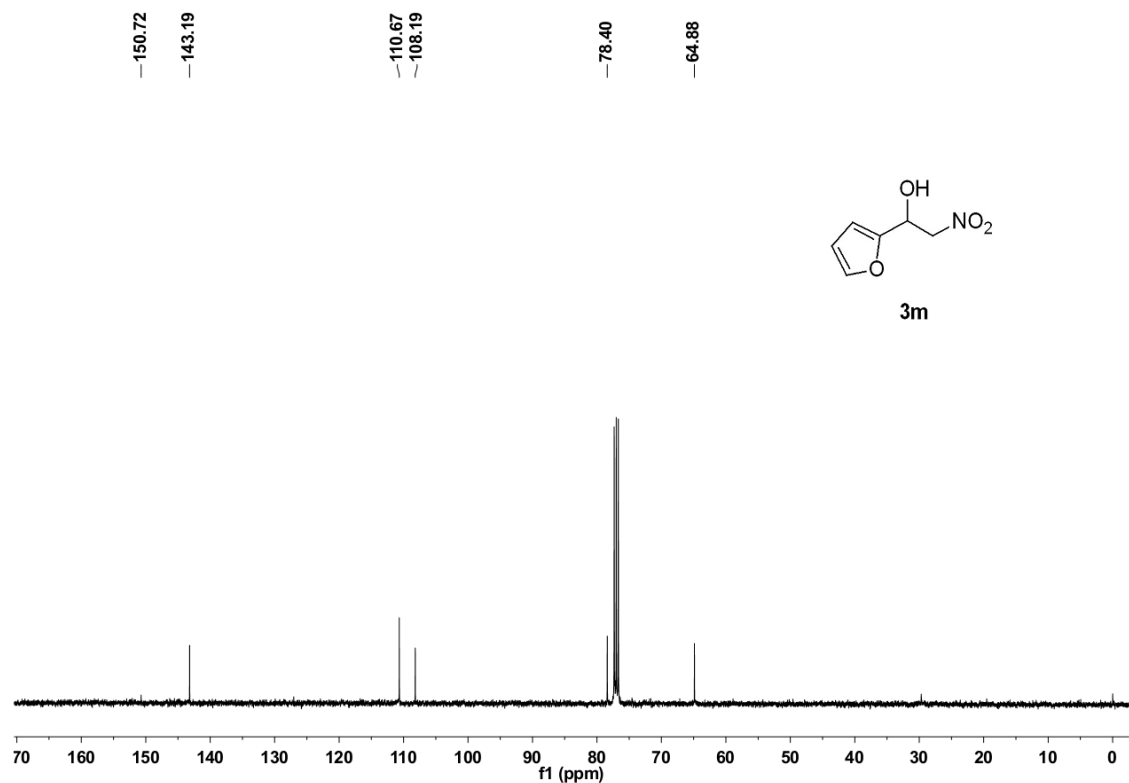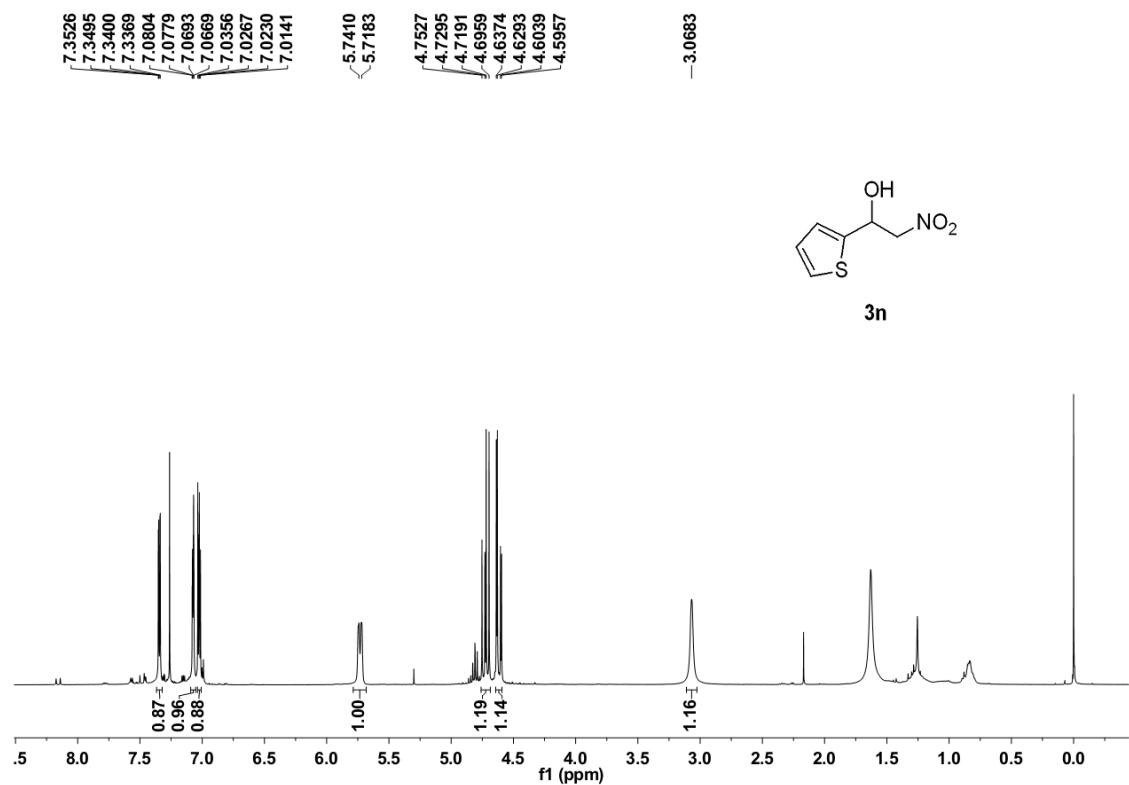

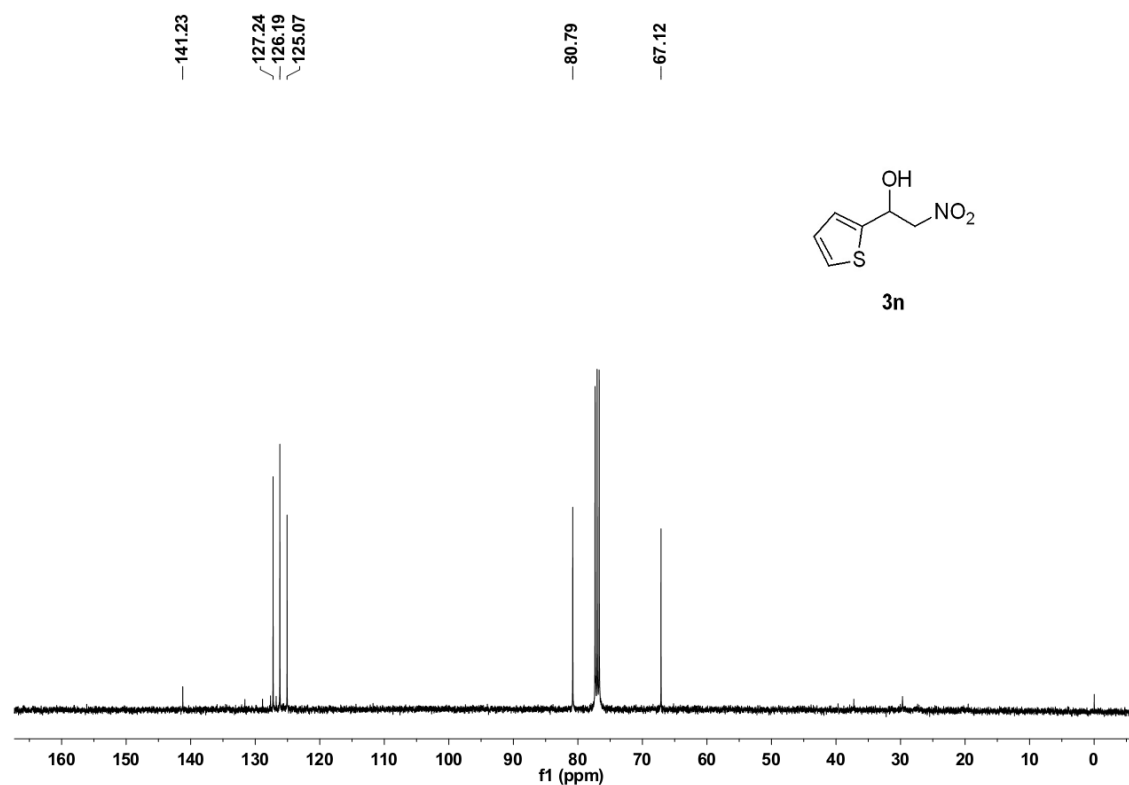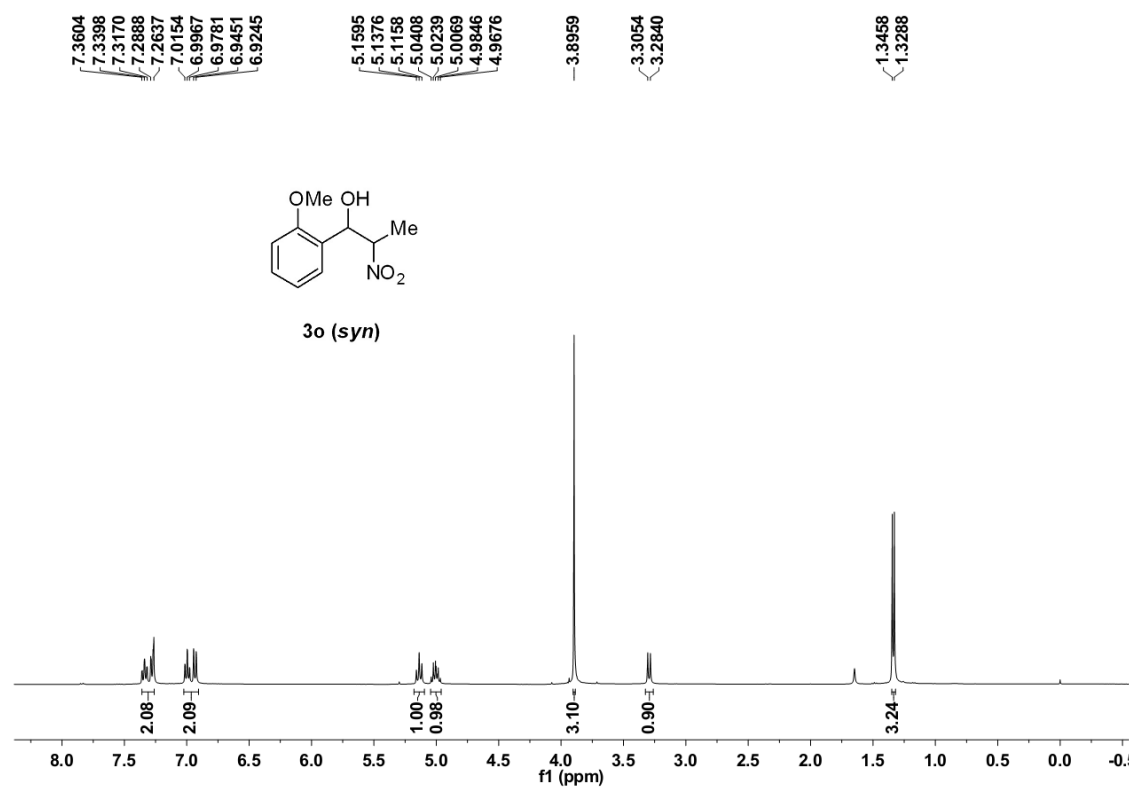

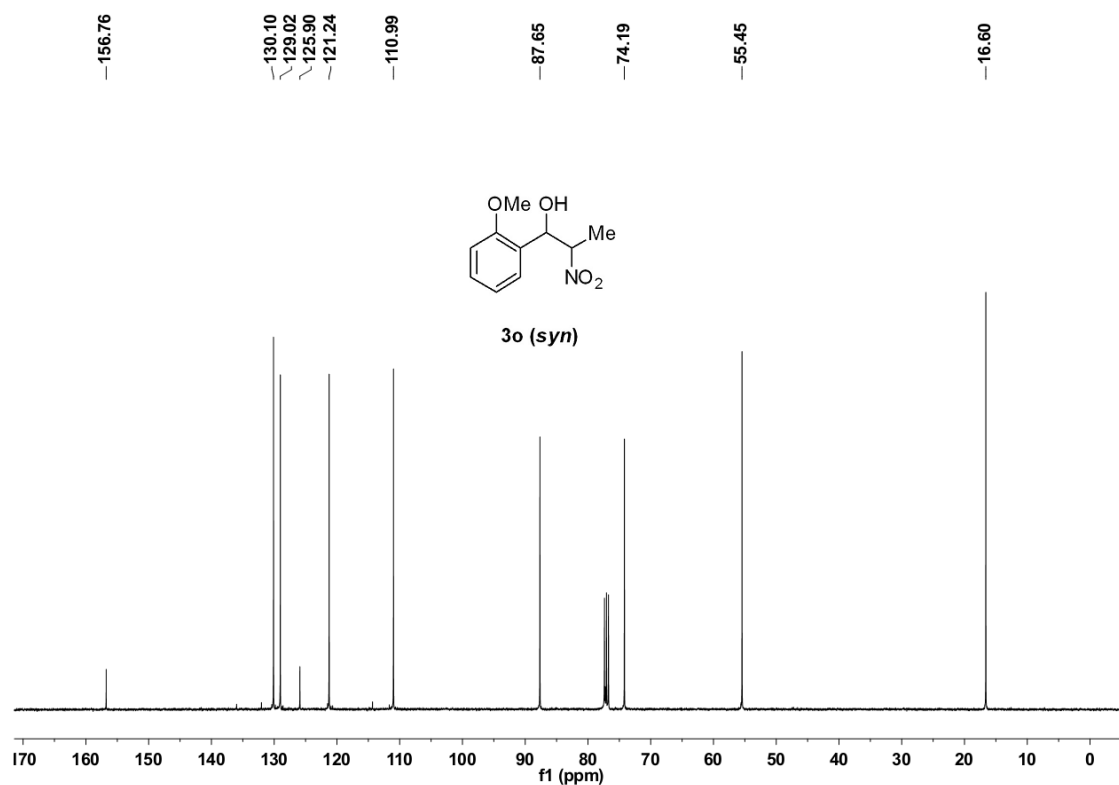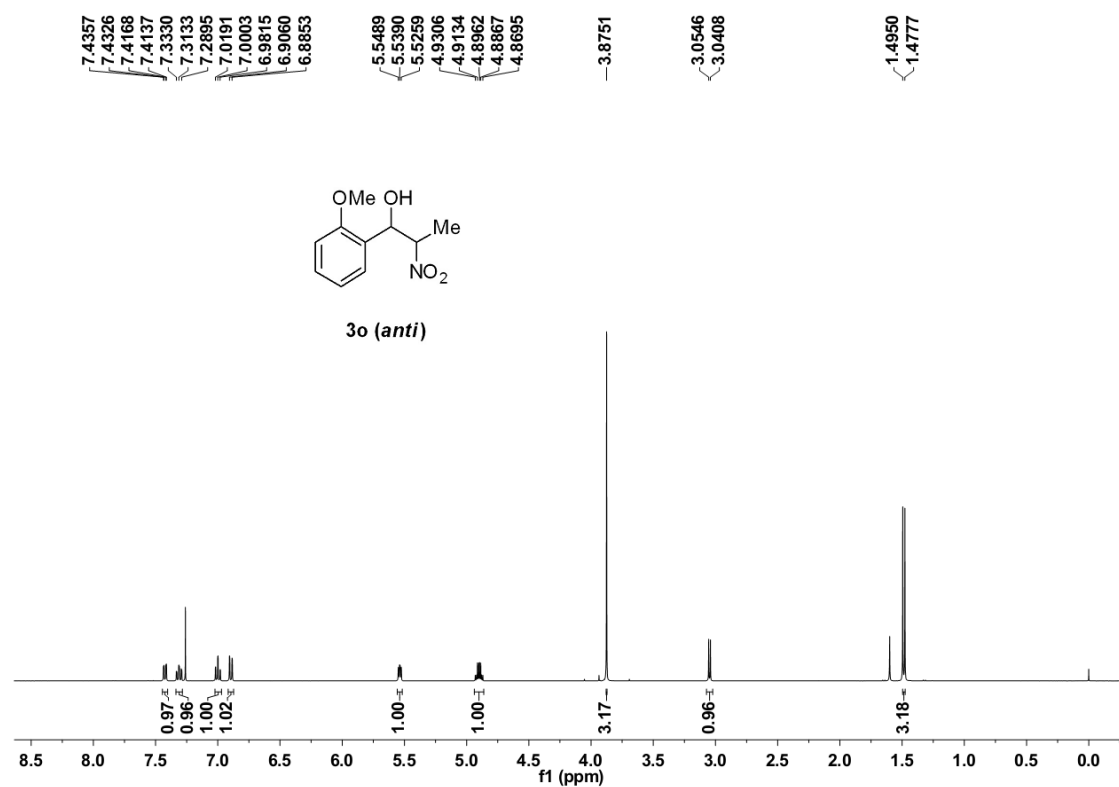

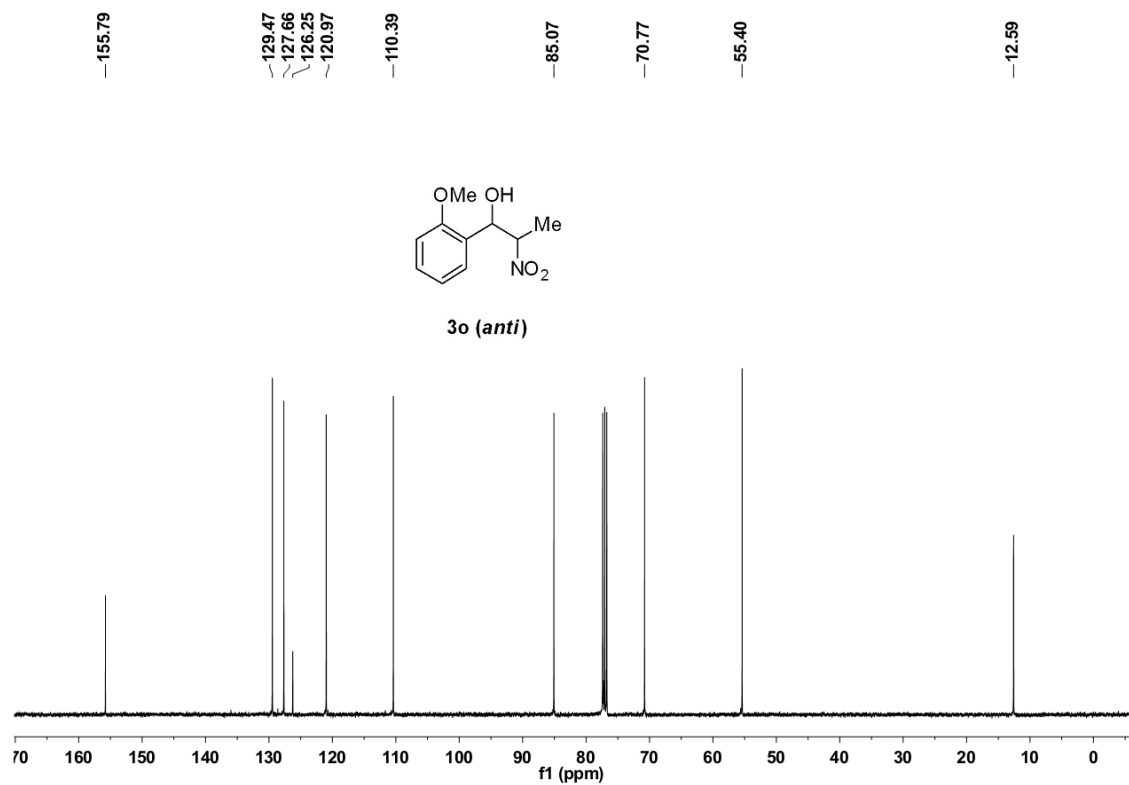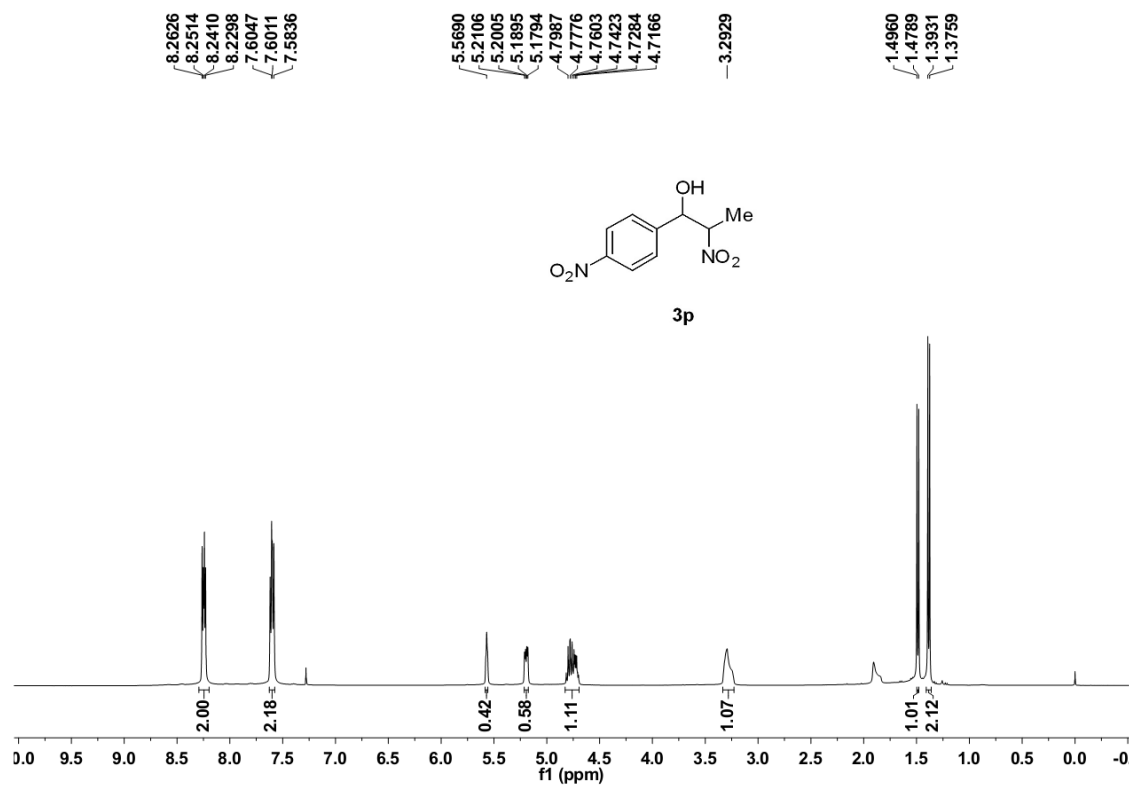

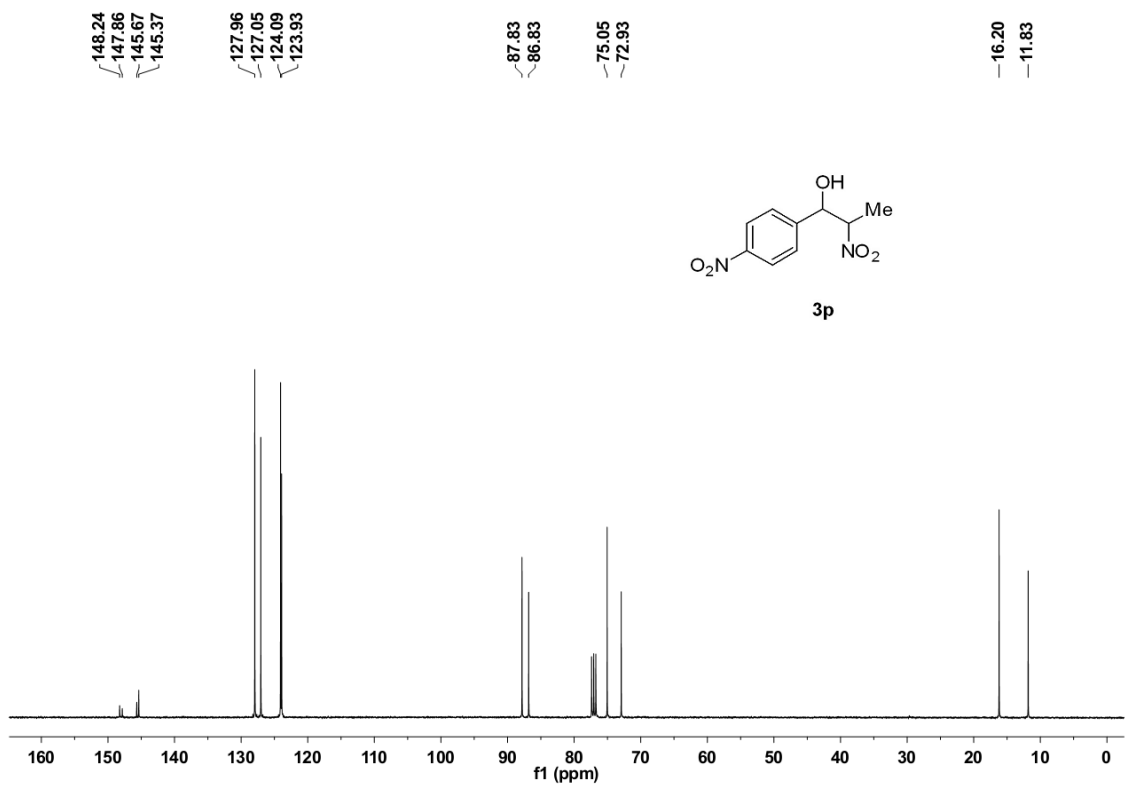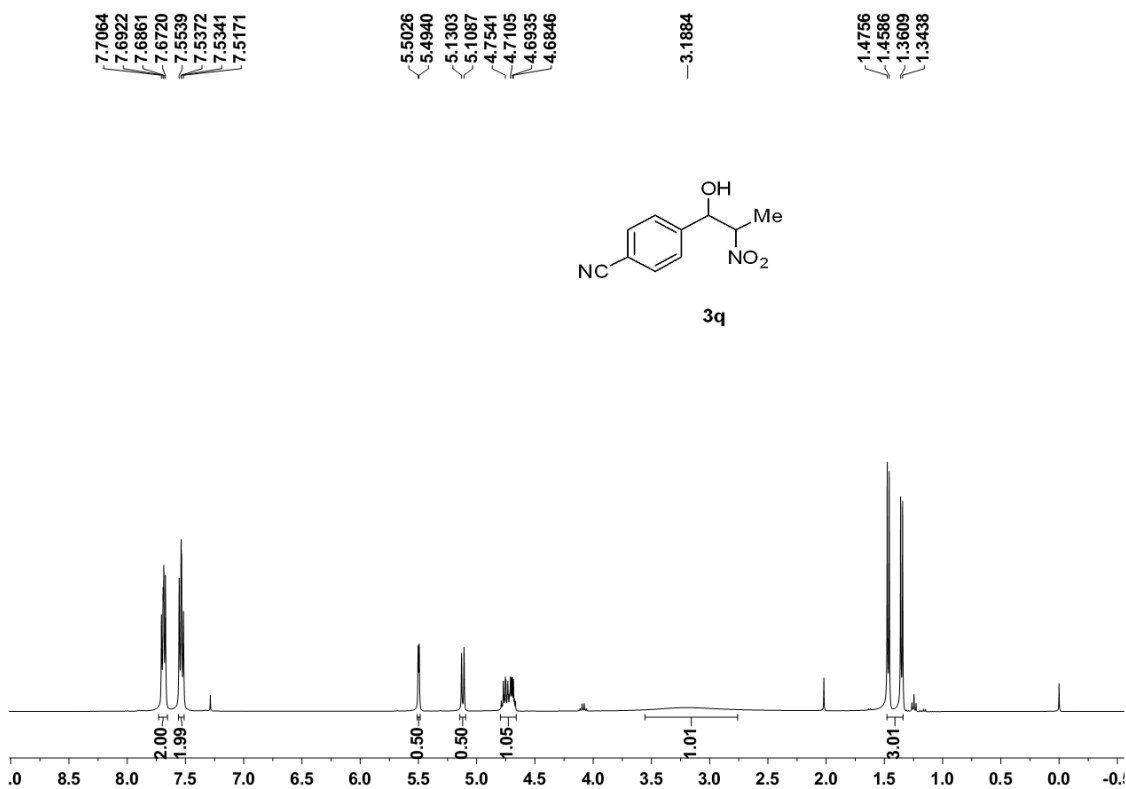

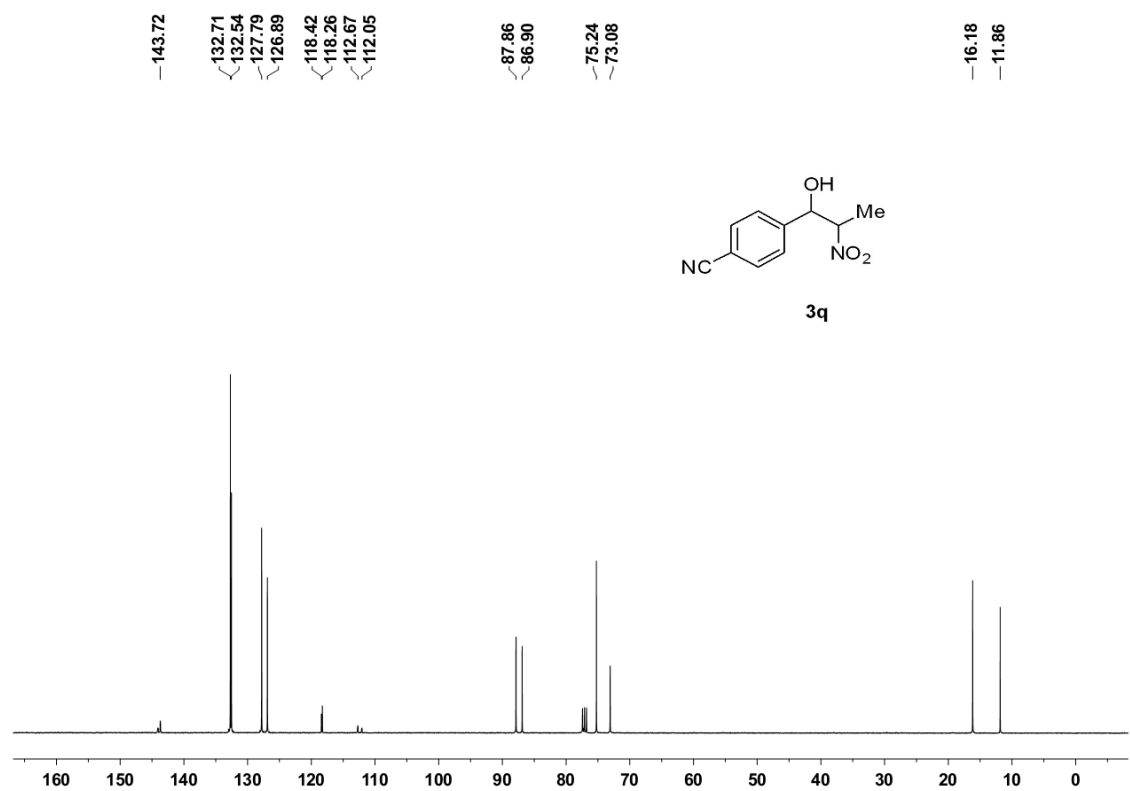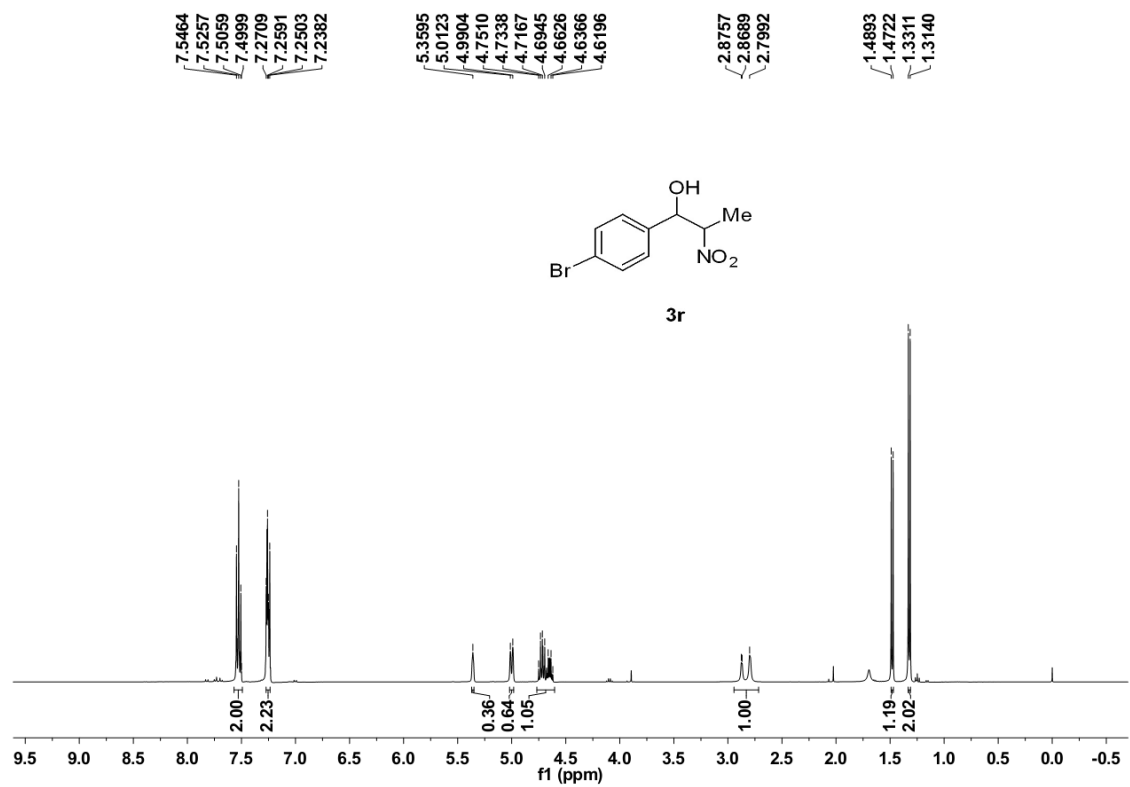

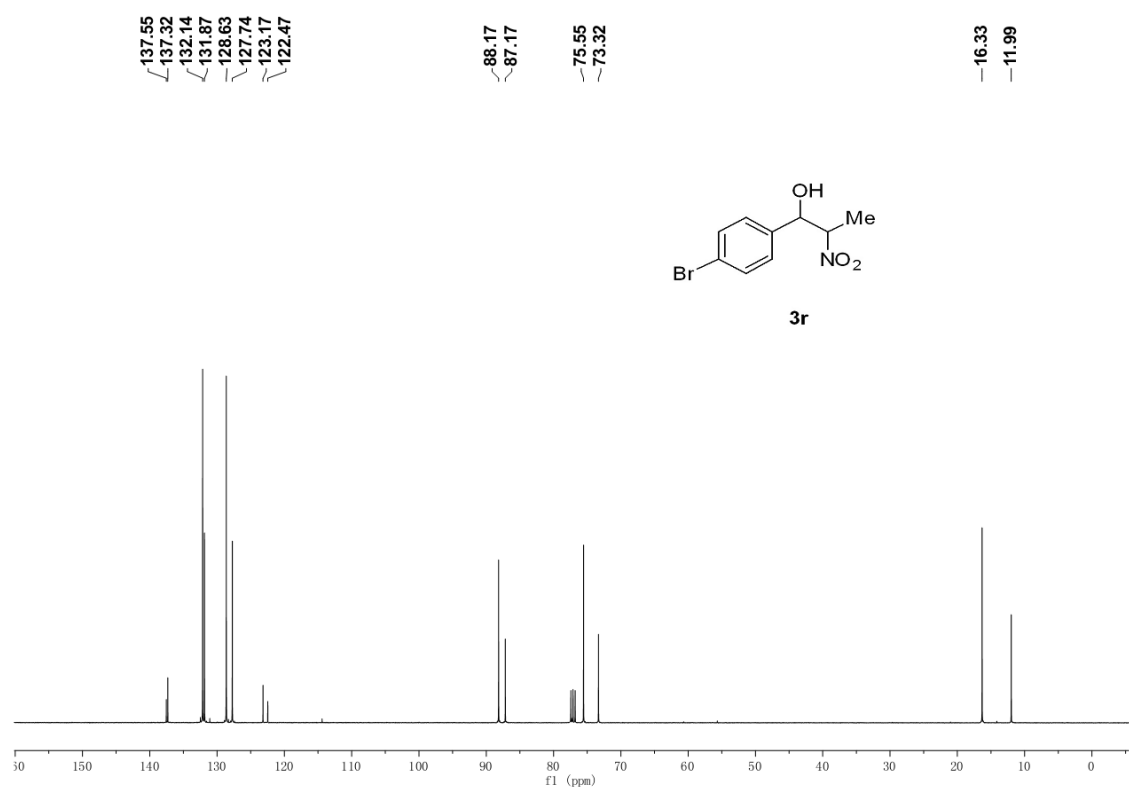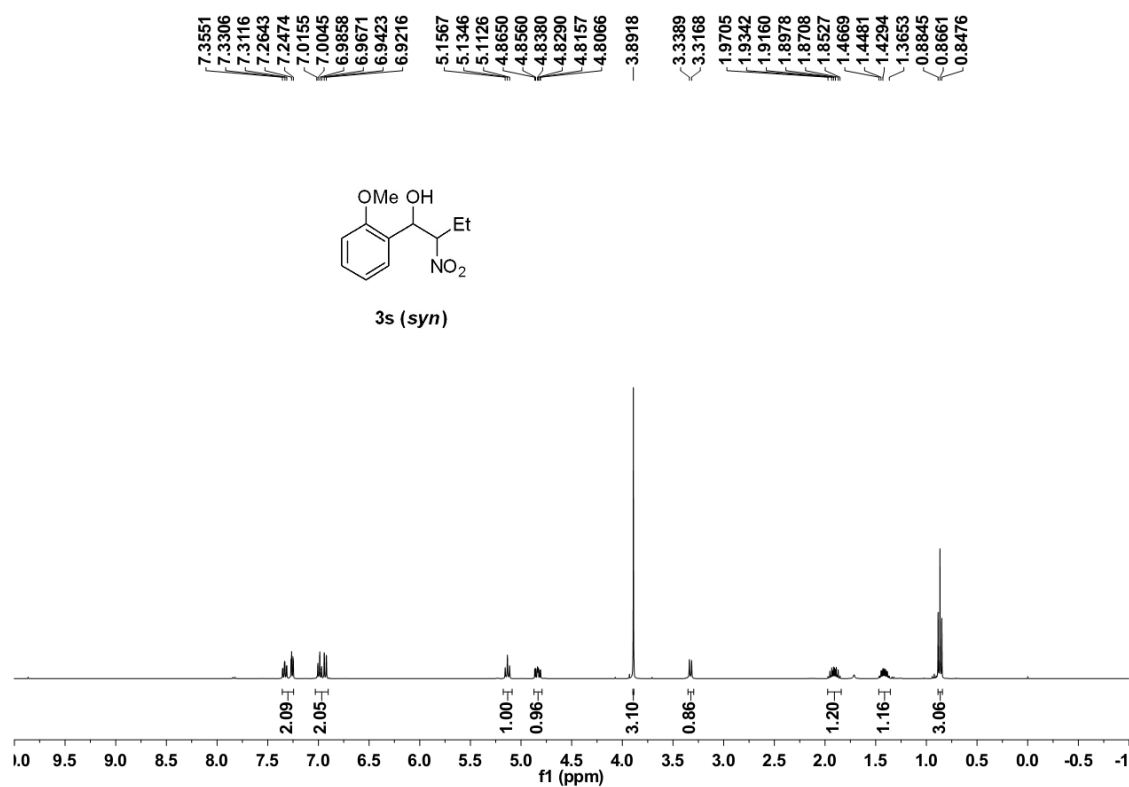

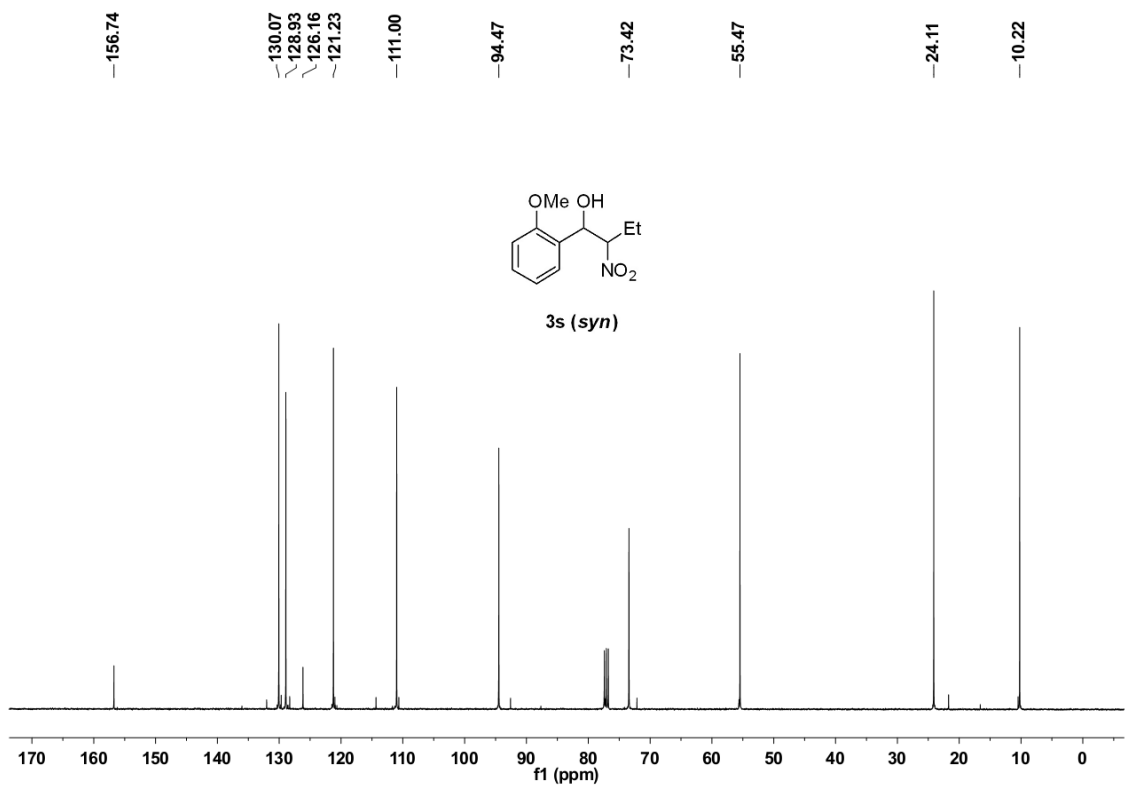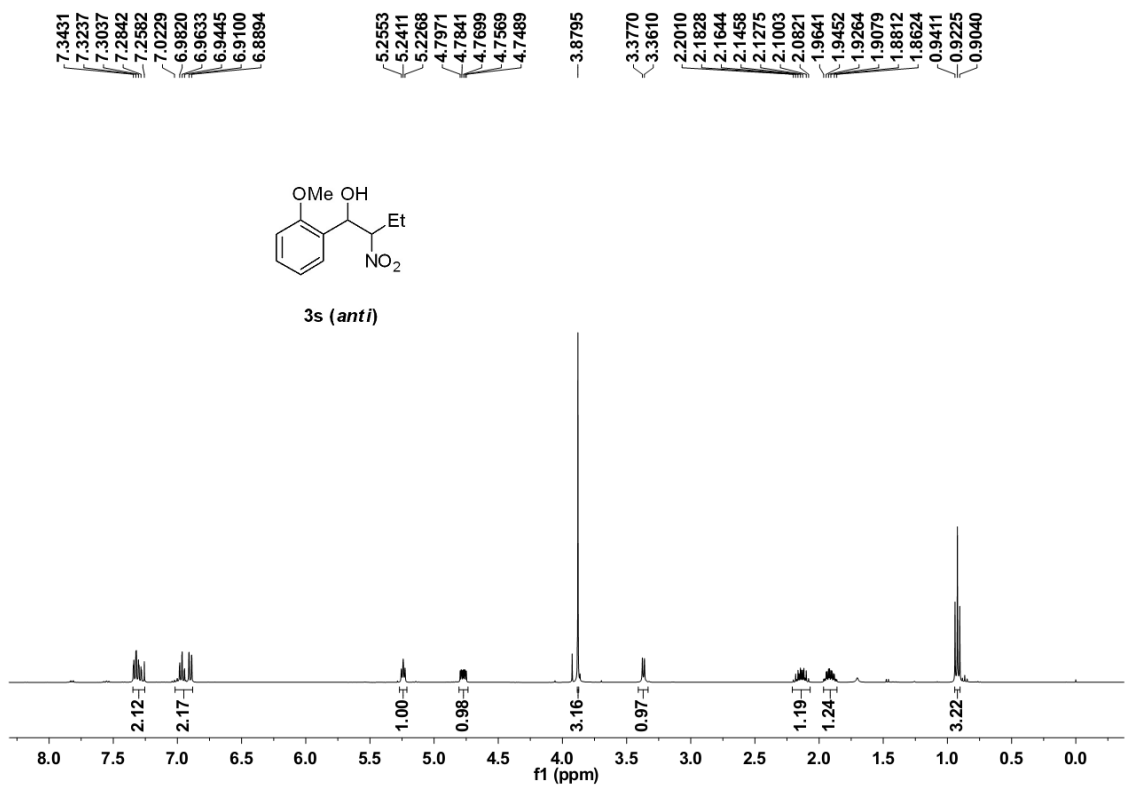

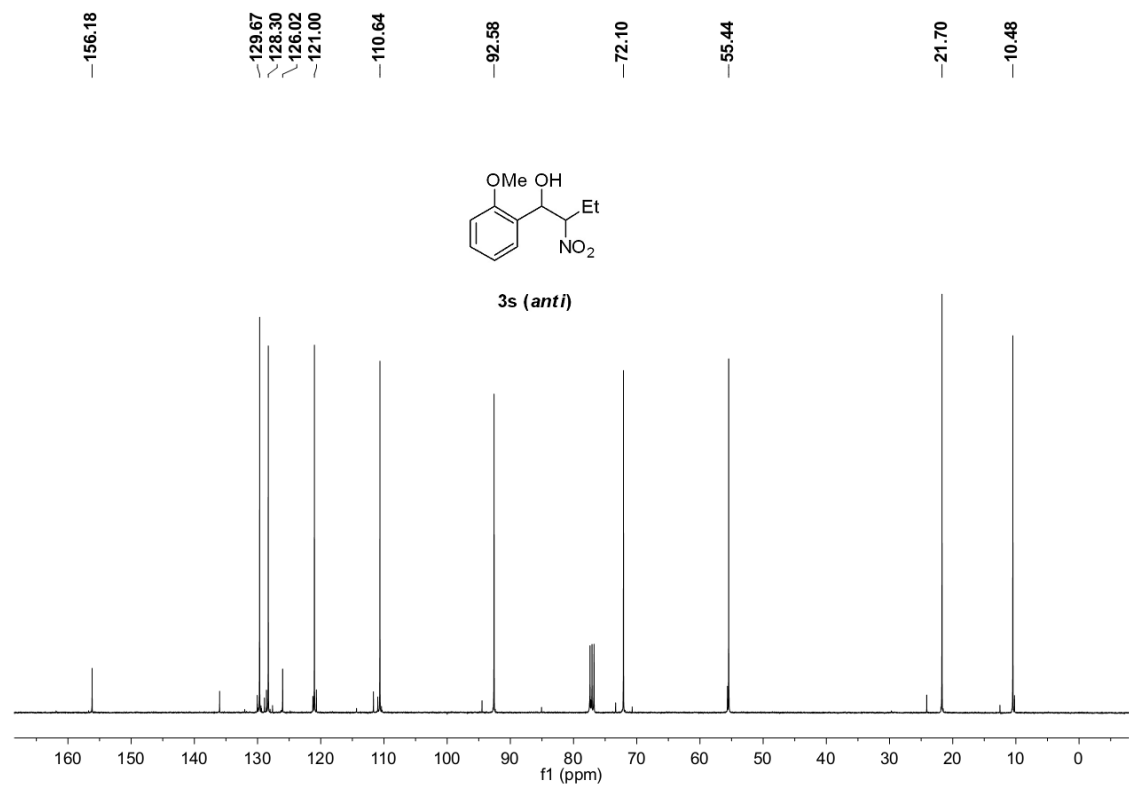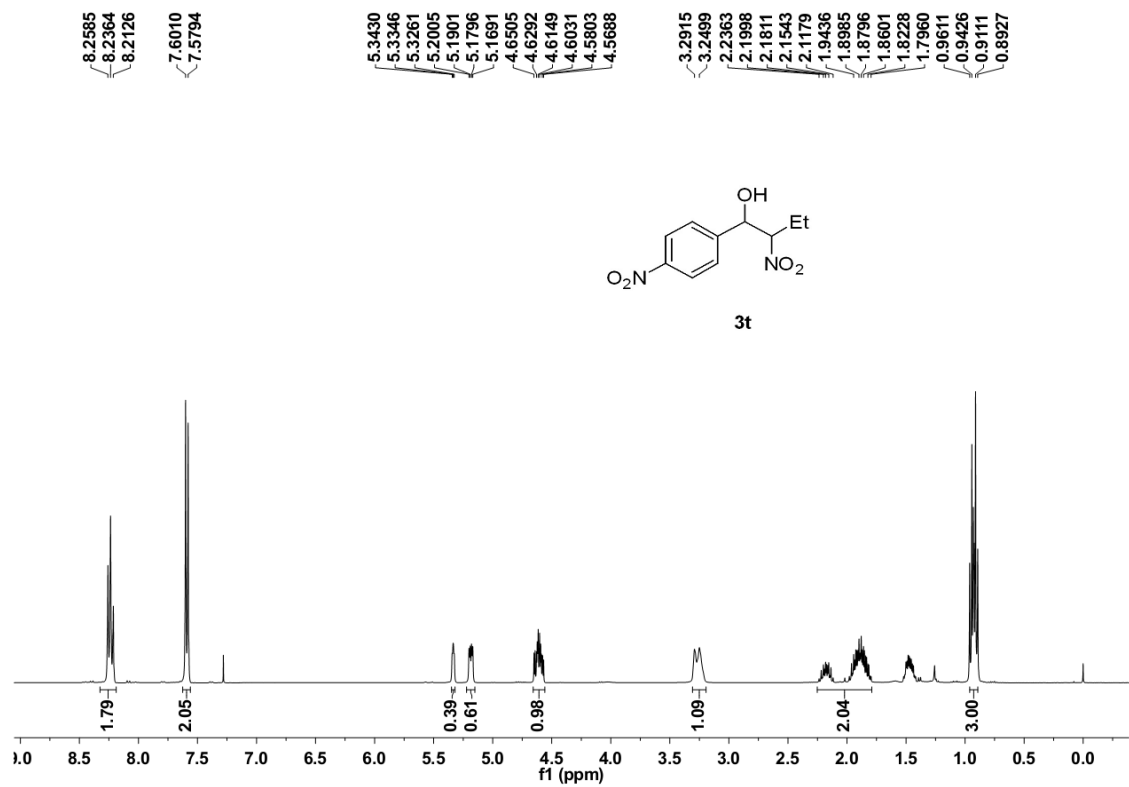

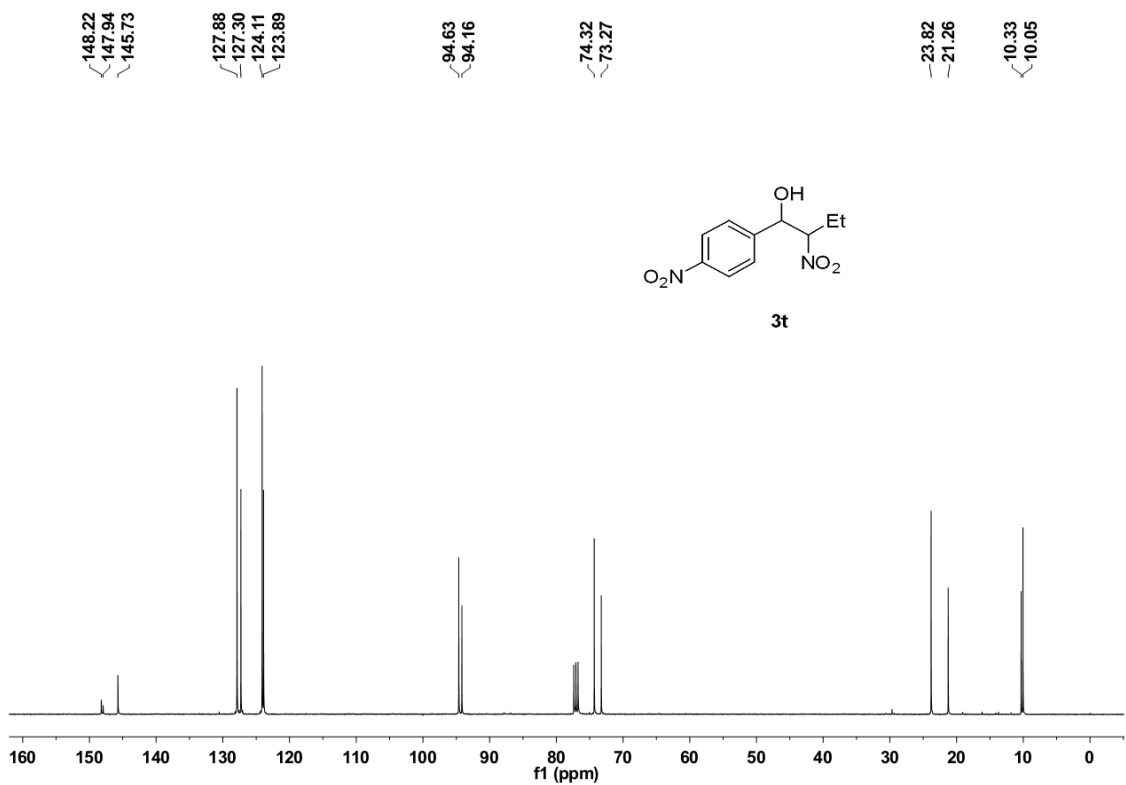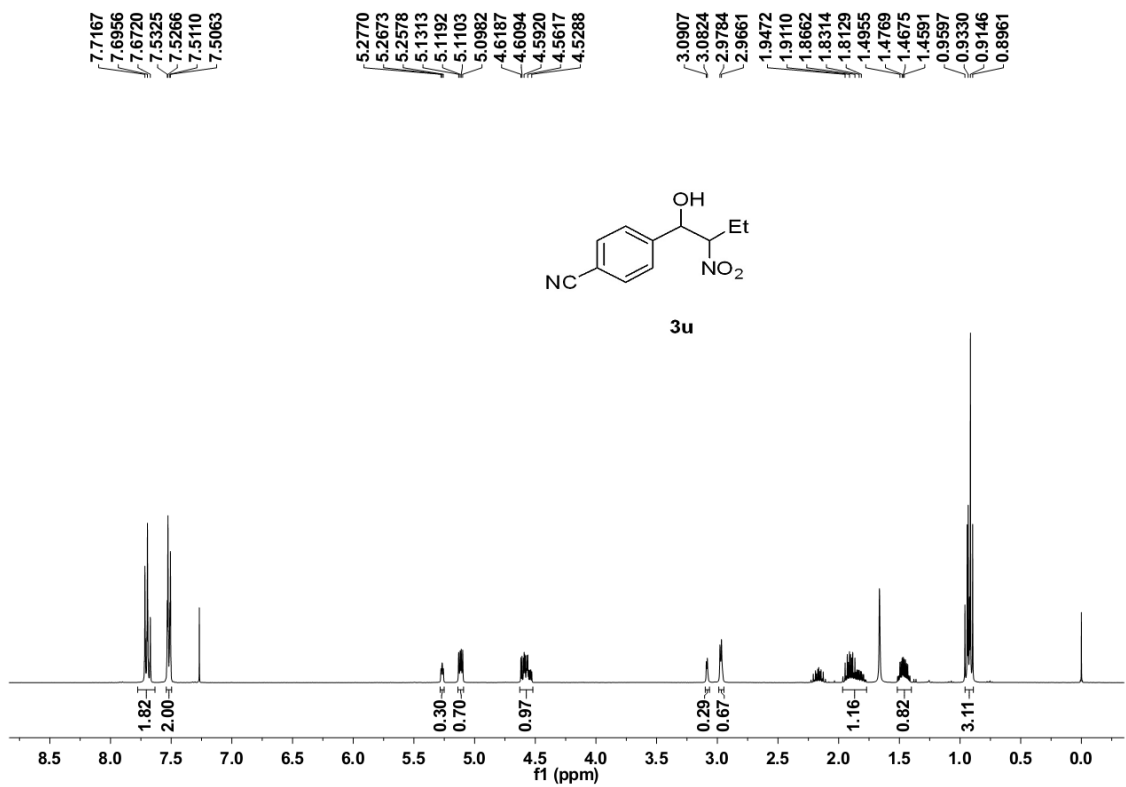

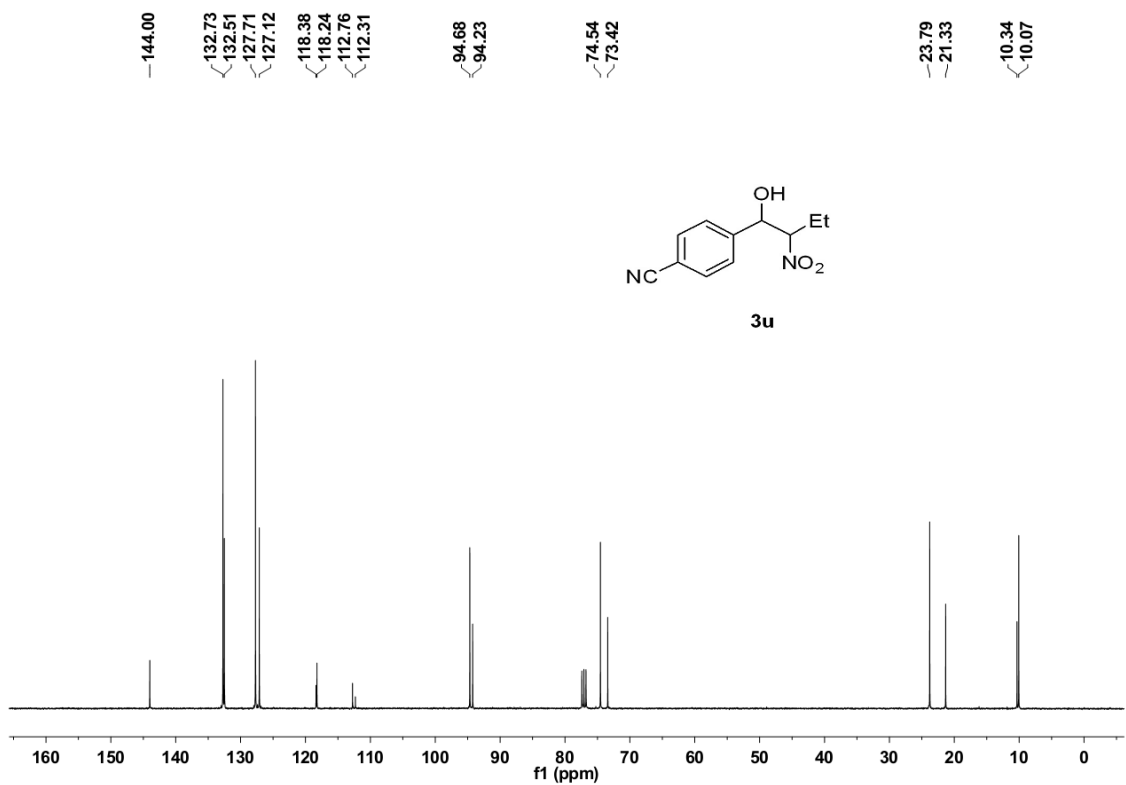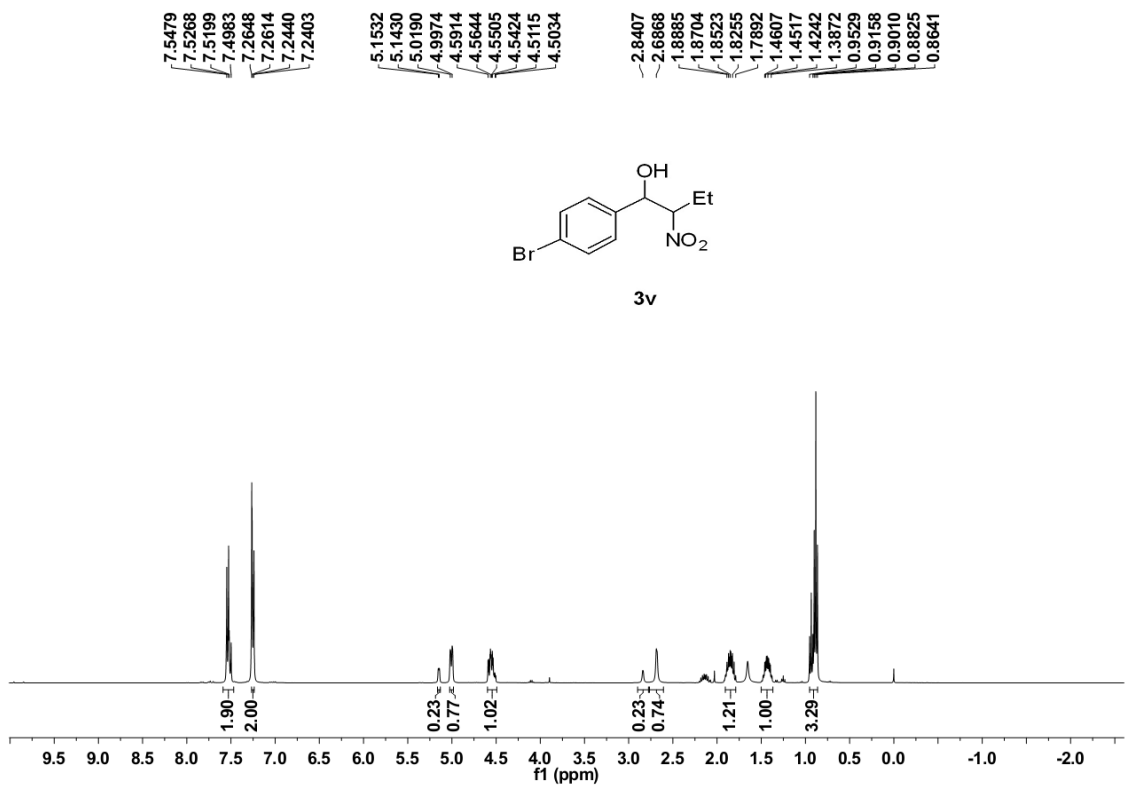

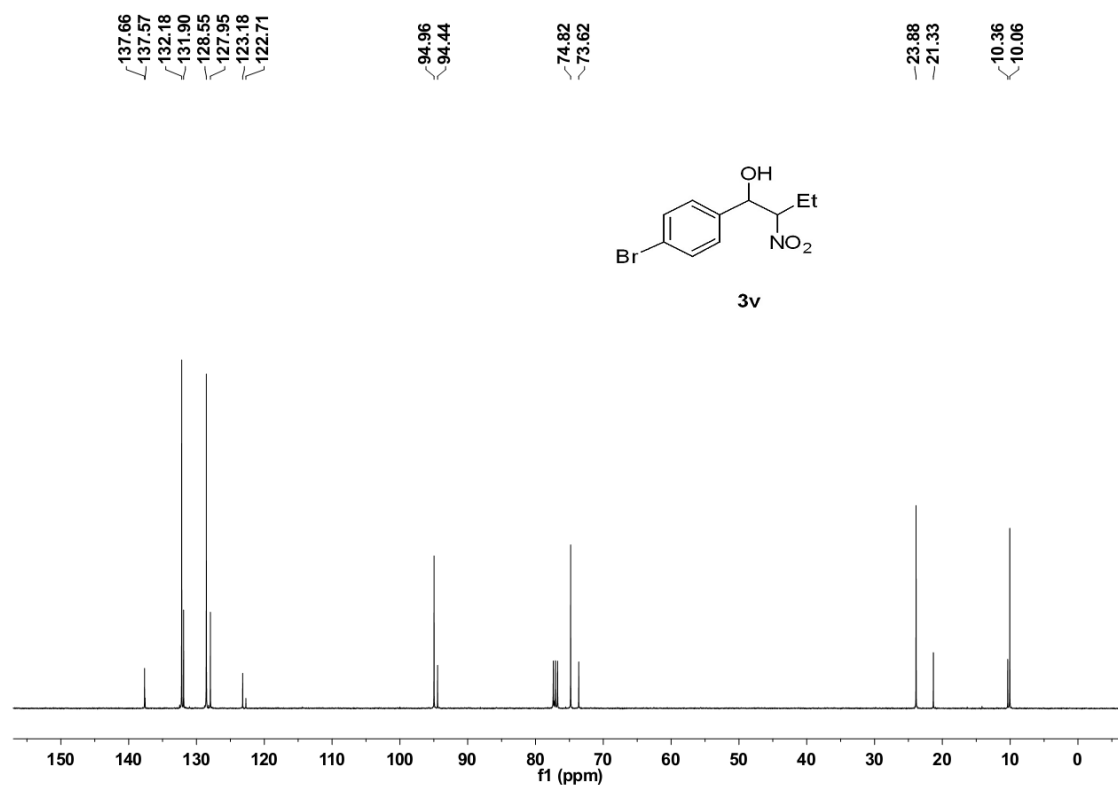

## 7. References

1. H. U. Bergmeyer, *Methods of enzymatic analysis*, Verlag Chemie, 1974, Second Edition, **1**, 434-435.
2. R. Kowalczyk, P. Kwiatkowski, J. Skarzewski and J. Jurczak, *J. Org. Chem.*, 2009, **74**, 753-756.
3. B. V. Subba Reddy and J. George, *Tetrahedron: Asymmetry*, 2011, **22**, 1169-1175.
4. J. Mao, X. Nie, M. Wang, Q. Wang, B. Zheng, Q. Bian and J. Zhong, *Tetrahedron: Asymmetry*, 2012, **23**, 965-971.
5. K. Kanagaraj, P. Suresh and K. Pitchumani, *Org. Lett.*, 2010, **12**, 4070-4073.
6. Y. Zhou and Y. Gong, *Eur. J. Org. Chem.*, 2011, **2011**, 6092-6099.
7. J.-J. Jiang and M. Shi, *Tetrahedron: Asymmetry*, 2007, **18**, 1376-1382.

8. Y. Zhou, J. Dong, F. Zhang and Y. Gong, *J. Org. Chem.*, 2011, **76**, 588-600.
9. M. Pandi, P. K. Chanani and S. Govindasamy, *Applied Catalysis A: General*, 2012, **441–442**, 119-123.
10. J. M. Saá, F. Tur, J. González and M. Vega, *Tetrahedron: Asymmetry*, 2006, **17**, 99-106.
11. H.-G. Cheng, L.-Q. Lu, T. Wang, J.-R. Chen and W.-J. Xiao, *Chem. Commun.*, 2012, **48**, 5596-5598.
12. L. Cheng, J. Dong, J. You, G. Gao and J. Lan, *Chem. Eur. J.*, 2010, **16**, 6761-6765.
13. G. Blay, L. R. Domingo, V. Hernández-Olmos and J. R. Pedro, *Chem. Eur. J.*, 2008, **14**, 4725-4730.
14. Y. Qiong Ji, G. Qi and Z. M. A. Judeh, *Tetrahedron: Asymmetry*, 2011, **22**, 2065-2070.
15. T. Nitabaru, A. Nojiri, M. Kobayashi, N. Kumagai and M. Shibasaki, *J. Am. Chem. Soc.*, 2009, **131**, 13860-13869.
16. A. Toussaint and A. Pfaltz, *European Journal of Organic Chemistry*, 2008, **2008**, 4591-4597.
